# Supplementary material for: Genetic Evidence Supporting the Association of Protease and Protease Inhibitor Genes with Inflammatory Bowel Disease: A Systematic Review
Source: PubMed Central journal article supplement (PMC3169567; doi:10.1371/journal.pone.0024106), 2011-09-08

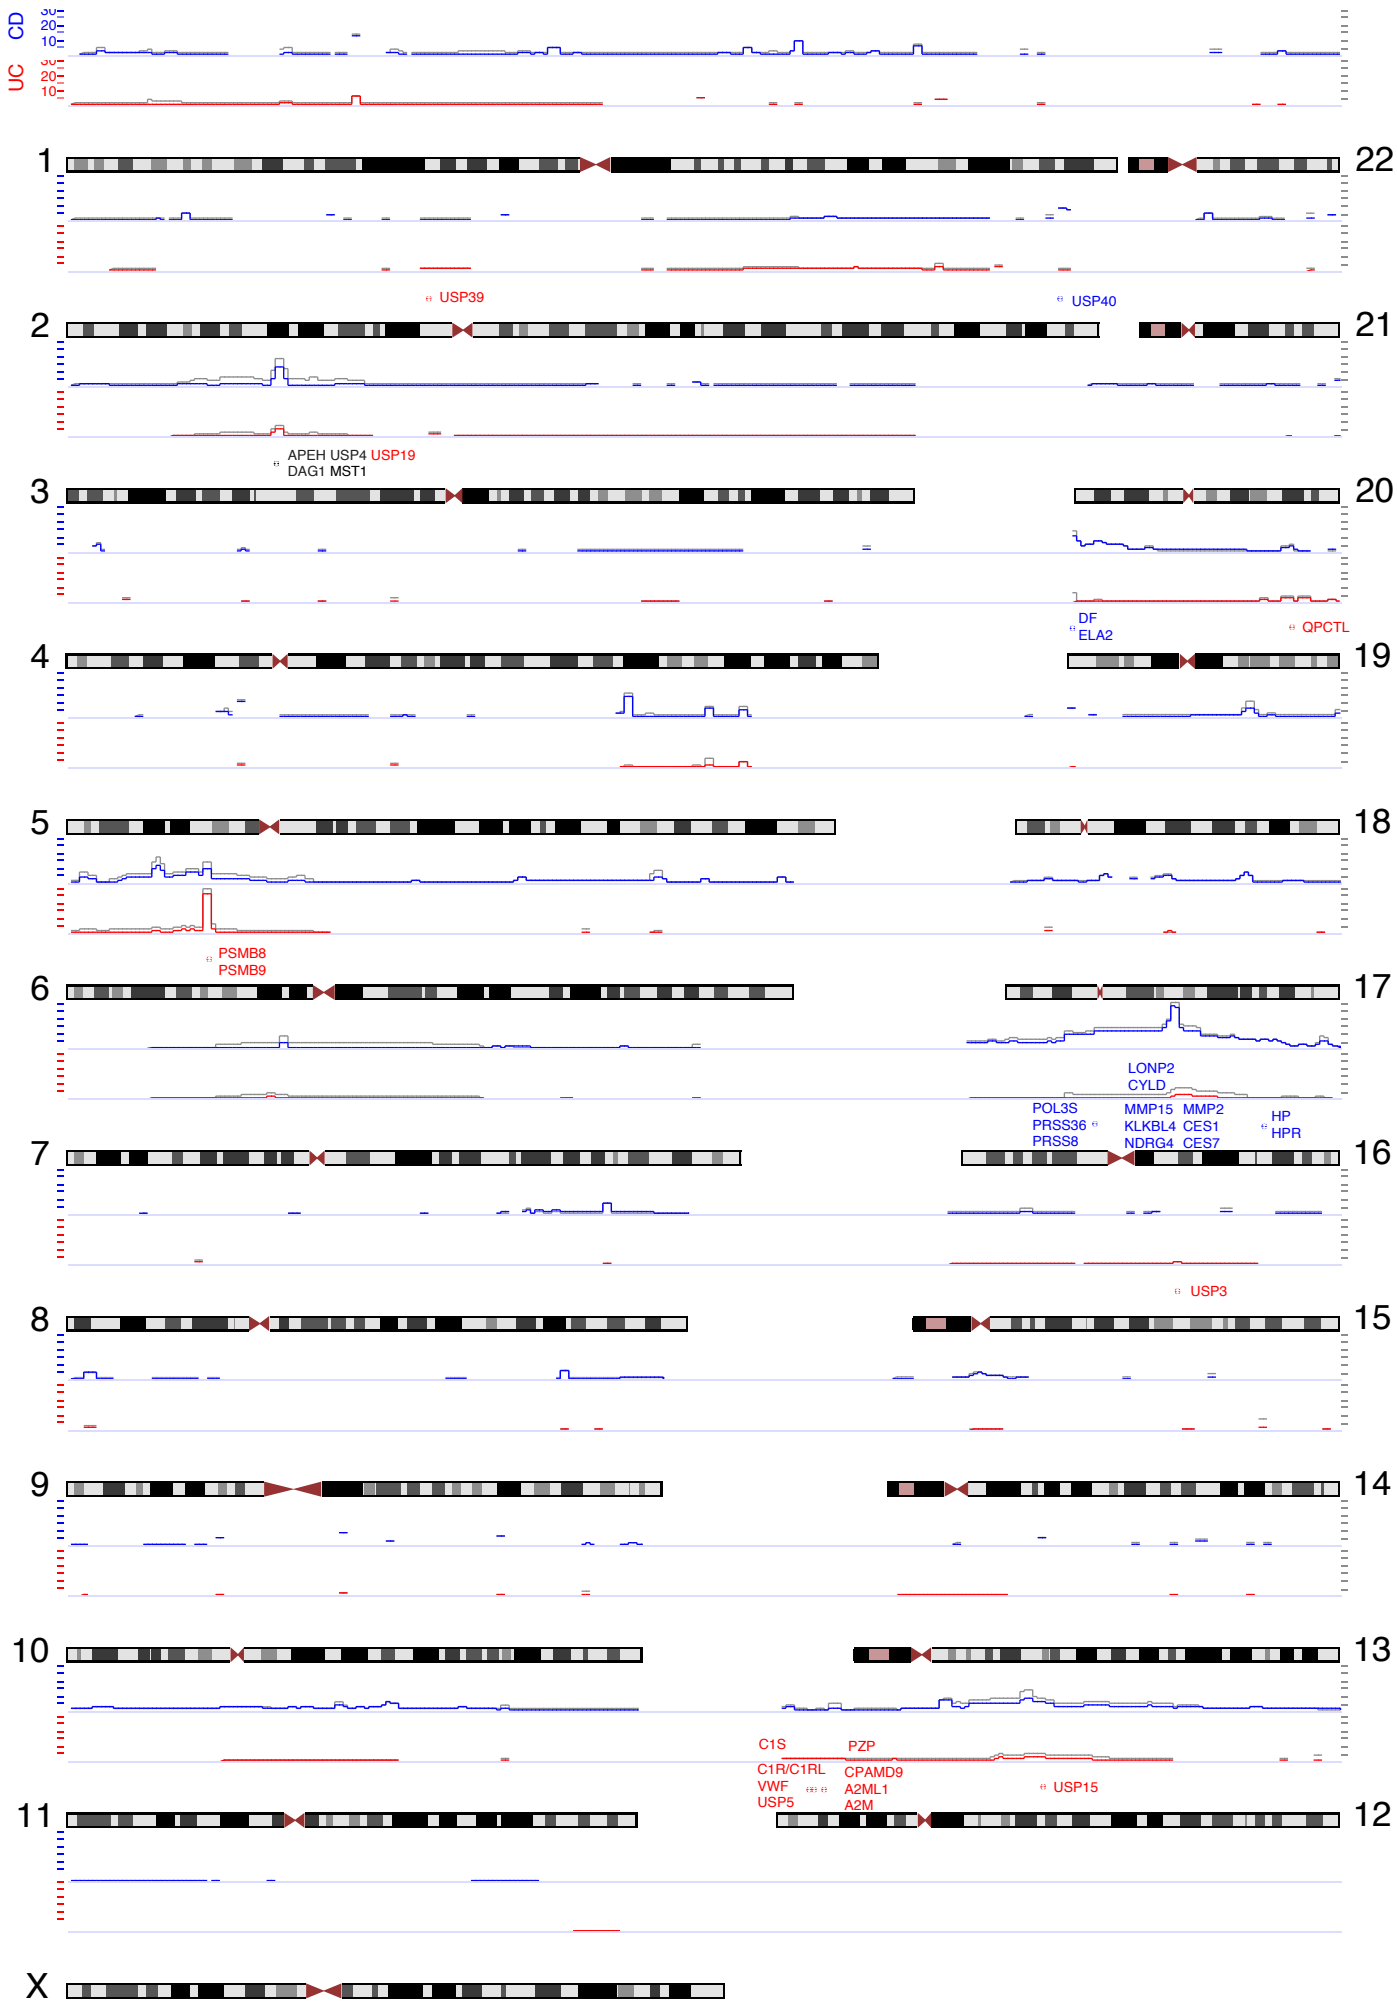

Supplement: pone.0024106.s001.pdf [file pone.0024106.s001.pdf]
