# Supplementary material for: Genetic Evidence Supporting the Association of Protease and Protease Inhibitor Genes with Inflammatory Bowel Disease: A Systematic Review
Source: PubMed Central journal article supplement (PMC3169567; doi:10.1371/journal.pone.0024106), 2011-09-08

**A****Comparison of ranks including/excluding GWAS for CD**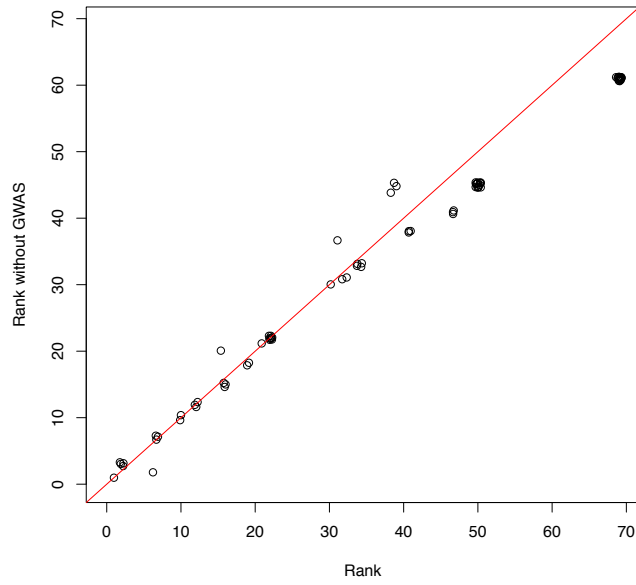**B****Comparison of ranks including/excluding GWAS for UC**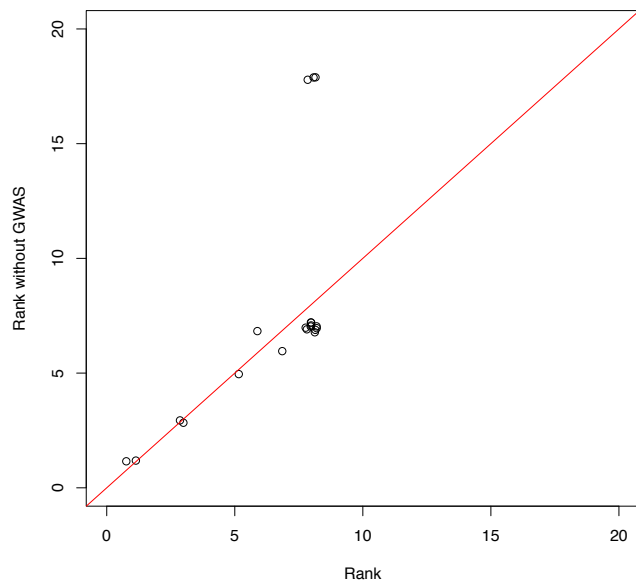

Supplement: pone.0024106.s002.pdf [file pone.0024106.s002.pdf]
