# Supplementary material for: Genetic Evidence Supporting the Association of Protease and Protease Inhibitor Genes with Inflammatory Bowel Disease: A Systematic Review
Source: PLoS One. 2011 Sep 8;6(9):e24106. doi: 10.1371/journal.pone.0024106 (PMC3169567; doi:10.1371/journal.pone.0024106)
Supplement: Table S1 — Assessment of the methodological quality of included studies. (XLS) [file pone.0024106.s004.xls]

## Sheet: Quality assessment
First author	Year of publication	Reference number	Study Type	Protection against bias in phenotype definition	Classification re phenotype definition	Protection against bias in genotype definition	Classification re genotype definition	Protection against population stratification	Classification re population stratification
Akolkar	2001	36	candidate region approach	clearly widely agreed definitions	adequate	appropriate quality control checks	adequate	same descent group	adequate
Annese	1999, 2003	37.38	candidate region approach	clearly widely agreed definitions	adequate	not reported	unclear	family-based design	adequate
WTCC2007	2007	19	whole genome association study	clearly widely agreed definitions	adequate	appropriate quality control checks	adequate	not reported	unclear
Barmada	2004	71	whole genome linkage study	clearly widely agreed definitions	adequate	appropriate quality control checks	adequate	family-based design	adequate
Barrett	2008	10	genome wide replication	not reported	unclear	appropriate quality control checks	adequate	not reported	unclear
Bottini	2005	24	candidate gene approach	clearly widely agreed definitions	adequate	no quality control	inadequate	same descent group	adequate
Brant	1998	39	candidate region approach	clearly widely agreed definitions	adequate	not reported	unclear	family-based design	adequate
Cavanaugh	1998	40	candidate region approach	clearly widely agreed definitions	adequate	not reported	unclear	family-based design	adequate
Cho	1997	41	candidate region approach	clearly widely agreed definitions	adequate	appropriate quality control checks	adequate	family-based design	adequate
Cho	1998	42	whole genome linkage study	clearly widely agreed definitions	adequate	appropriate quality control checks	adequate	family-based design	adequate
Curran	1998	43	candidate region approach	clearly widely agreed definitions	adequate	not reported	unclear	family-based design	adequate
Cuthbert	2004	25	candidate gene approach	not reported	unclear	not reported	unclear	same descent group	adequate
Dechairo, Low	2001, 2004	44,55	candidate region approach	clearly widely agreed definitions	adequate	appropriate quality control checks	adequate	family-based design	adequate
Duerr	1998	45	candidate region approach	not reported	unclear	appropriate quality control checks	adequate	family-based design	adequate
Duerr	2002	46	candidate region approach	clearly widely agreed definitions	adequate	appropriate quality control checks	adequate	family-based design	adequate
Duerr	2000, 2002(2006)	72,7	whole genome linkage study	not reported	unclear	appropriate quality control checks	adequate	family-based design	adequate
Elmgreen	1984	26	candidate gene approach	clearly widely agreed definitions	adequate	no quality control	inadequate	not reported	unclear
Farmer	2001	47	candidate region approach	clearly widely agreed definitions	adequate	appropriate quality control checks	adequate	not reported	unclear
Fisher	2008	11	candidate region approach	clearly widely agreed definitions	adequate	appropriate quality control checks	adequate	same descent group	adequate
Fisher	2008	11	genome wide replication	clearly widely agreed definitions	adequate	appropriate quality control checks	adequate	same descent group	adequate
Fisher	2008	11	genome wide replication	clearly widely agreed definitions	adequate	appropriate quality control checks	adequate	same descent group	adequate
Fisher	2008	11	whole genome association study	clearly widely agreed definitions	adequate	appropriate quality control checks	adequate	genomic control	adequate
Franke	2008	12	genome wide replication	clearly widely agreed definitions	adequate	appropriate quality control checks	adequate	same descent group	adequate
Franke	2008	12	genome wide replication	clearly widely agreed definitions	adequate	appropriate quality control checks	adequate	same descent group	adequate
Franke	2008	12	genome wide replication	clearly widely agreed definitions	adequate	appropriate quality control checks	adequate	same descent group	adequate
Franke	2008	12	genome wide replication	clearly widely agreed definitions	adequate	appropriate quality control checks	adequate	not reported	unclear
Franke	2008	94	whole genome association study	clearly widely agreed definitions	adequate	appropriate quality control checks	adequate	not reported	unclear
Franke	2007	23	genome wide replication	clearly widely agreed definitions	adequate	appropriate quality control checks	adequate	not reported	unclear
Hampe	1999	48	whole genome linkage study	clearly widely agreed definitions	adequate	appropriate quality control checks	adequate	family-based design	adequate
Hampe	2007	20	whole genome association study	clearly widely agreed definitions	adequate	appropriate quality control checks	adequate	statistical adjustment	adequate
Hampe	1999, 2001, 2002	48,49,50	candidate region approach	clearly widely agreed definitions	adequate	appropriate quality control checks	adequate	family-based design	adequate
Haslam	2001	27	candidate gene approach	not reported	unclear	not reported	unclear	not reported	unclear
Herbon	2003	51	candidate region approach	not reported	unclear	appropriate quality control checks	adequate	same descent group	adequate
Hugot	1994	52	candidate region approach	efforts for retrospective harmonization	adequate	appropriate quality control checks	adequate	family-based design	adequate
Hugot	1996	53	candidate region approach	not reported	unclear	not reported	unclear	family-based design	adequate
Hugot	1996	53	candidate region approach	not reported	unclear	not reported	unclear	family-based design	adequate
Hugot	1996	53	whole genome linkage study	not reported	unclear	not reported	unclear	family-based design	adequate
Hume	2006	28	candidate gene approach	clearly widely agreed definitions	adequate	not reported	unclear	not reported	unclear
Hume	2006	28	candidate gene approach	clearly widely agreed definitions	adequate	not reported	unclear	not reported	unclear
Lesage	2000	54	candidate region approach	clearly widely agreed definitions	adequate	appropriate quality control checks	adequate	family-based design	adequate
Libioulle	2007	21	candidate region approach	clearly widely agreed definitions	adequate	appropriate quality control checks	adequate	same descent group	adequate
Libioulle	2007	21	whole genome association study	not reported	unclear	appropriate quality control checks	adequate	statistical adjustment	adequate
Ma	1999	73	whole genome linkage study	clearly widely agreed definitions	adequate	appropriate quality control checks	adequate	family-based design	adequate
Meijer	2007	29	candidate gene approach	clearly widely agreed definitions	adequate	not reported	unclear	not reported	unclear
Mirza	1998	56	candidate region approach	efforts for retrospective harmonization	adequate	not reported	unclear	family-based design	adequate
Ohmen	1996	57	candidate region approach	clearly widely agreed definitions	adequate	not reported	unclear	family-based design	adequate
Over-Hamzaoglu	2005	30	candidate gene approach	clearly widely agreed definitions	adequate	not reported	unclear	not reported	unclear
Paavola	2001	59	candidate region approach	efforts for retrospective harmonization	adequate	not reported	unclear	family-based design	adequate
Paavola-Sakki	2002	58	candidate region approach	clearly widely agreed definitions	adequate	not reported	unclear	family-based design	adequate
Paavola-Sakki	2002	58	whole genome linkage study	clearly widely agreed definitions	adequate	not reported	unclear	family-based design	adequate
Parkes	1996	80	candidate region approach	not reported	unclear	not reported	unclear	family-based design	adequate
Parkes	2007	9	genome wide replication	clearly widely agreed definitions	adequate	not reported	unclear	same descent group	adequate
Pender	2004	32	candidate gene approach	clearly widely agreed definitions	adequate	not reported	unclear	family-based design	adequate
Pender	2004	32	candidate gene approach	clearly widely agreed definitions	adequate	not reported	unclear	family-based design	adequate
Pender	2004	32	candidate gene approach	clearly widely agreed definitions	adequate	not reported	unclear	family-based design	adequate
Peters	2005	31	candidate gene approach	clearly widely agreed definitions	adequate	appropriate quality control checks	adequate	same descent group	adequate
Pierik	2005	61	candidate region approach	clearly widely agreed definitions	adequate	appropriate quality control checks	adequate	family-based design	adequate
Raelson	2007	22	candidate region approach	clearly widely agreed definitions	adequate	appropriate quality control checks	adequate	not reported	unclear
Raelson	2007	22	candidate region approach	clearly widely agreed definitions	adequate	appropriate quality control checks	adequate	not reported	unclear
Raelson	2007	22	candidate region approach	clearly widely agreed definitions	adequate	appropriate quality control checks	adequate	not reported	unclear
Raelson	2007	22	whole genome association study	clearly widely agreed definitions	adequate	appropriate quality control checks	adequate	not reported	unclear
Rioux	1998	62	candidate region approach	clearly widely agreed definitions	adequate	not reported	unclear	family-based design	adequate
Rioux	2000	63	candidate region approach	clearly widely agreed definitions	adequate	appropriate quality control checks	adequate	family-based design	adequate
Rioux	2000	63	whole genome linkage study	clearly widely agreed definitions	adequate	not reported	unclear	family-based design	adequate
Rioux	2001	64	candidate region approach	not reported	unclear	not reported	unclear	family-based design	adequate
Rioux	2007	8	candidate gene approach	clearly widely agreed definitions	adequate	appropriate quality control checks	adequate	not reported	unclear
Rioux	2007	8	candidate gene approach	clearly widely agreed definitions	adequate	appropriate quality control checks	adequate	family-based design	adequate
Rioux	2007	8	whole genome association study	clearly widely agreed definitions	adequate	appropriate quality control checks	adequate	genomic control	adequate
Satsangi	1996	65	candidate region approach	unclear phenotype definitions	inadequate	not reported	unclear	family-based design	adequate
Satsangi	1996	65	whole genome linkage study	unclear phenotype definitions	inadequate	not reported	unclear	family-based design	adequate
Tello-Ruiz	2006	66	candidate gene approach	clearly widely agreed definitions	adequate	appropriate quality control checks	adequate	same descent group	adequate
Tello-Ruiz	2006	66	candidate gene approach	clearly widely agreed definitions	adequate	appropriate quality control checks	adequate	family-based design	adequate
Tello-Ruiz	2006	66	candidate gene approach	clearly widely agreed definitions	adequate	appropriate quality control checks	adequate	same descent group	adequate
Tello-Ruiz	2006	66	candidate region approach	clearly widely agreed definitions	adequate	appropriate quality control checks	adequate	same descent group	adequate
Uthoff	2002	67	candidate region approach	clearly widely agreed definitions	adequate	appropriate quality control checks	adequate	same descent group	adequate
VanHeel	2003	74	whole genome linkage study	clearly widely agreed definitions	adequate	appropriate quality control checks	adequate	family-based design	adequate
Vecchi	2000	33	candidate gene approach	clearly widely agreed definitions	adequate	appropriate quality control checks	adequate	not reported	unclear
Vermeire	2000	68	candidate region approach	clearly widely agreed definitions	adequate	not reported	unclear	family-based design	adequate
Vermeire	2004	75	whole genome linkage study	clearly widely agreed definitions	adequate	not reported	unclear	family-based design	adequate
Williams	2002	76	whole genome linkage study	not reported	unclear	appropriate quality control checks	adequate	family-based design	adequate
Yang	1999	69	candidate region approach	clearly widely agreed definitions	adequate	not reported	unclear	family-based design	adequate
Yasa	2007	35	candidate gene approach	clearly widely agreed definitions	adequate	appropriate quality control checks	adequate	same descent group	adequate
Yilmaz	2006	34	candidate gene approach	clearly widely agreed definitions	adequate	appropriate quality control checks	adequate	not reported	unclear
Zouali	2001	70	candidate region approach	clearly widely agreed definitions	adequate	appropriate quality control checks	adequate	family-based design	adequate
