# Supplementary material for: Genetic Evidence Supporting the Association of Protease and Protease Inhibitor Genes with Inflammatory Bowel Disease: A Systematic Review
Source: PLoS One. 2011 Sep 8;6(9):e24106. doi: 10.1371/journal.pone.0024106 (PMC3169567; doi:10.1371/journal.pone.0024106)
Supplement: Table S2 — Proteases and protease inhibitors with exact genomic location extracted from the Merops database (release 8.2). (XLS) [file pone.0024106.s005.xls]

## Sheet: Sheet1
gene_name	name_ppi	genomic_region	bp_location
A1BG	alpha-1B-glycoprotein (alpha-1B-glycoprotein)	19cen-q13.2	19:63548356-63556669(-)
A2M	alpha-2-macroglobulin	12p13.31	12:9096693-9159825(-)
A2ML1	alpha-2-macroglobulin-like 1 protein	12p13.31	12:8866484-8920646(+)
AADAC	arylacetamide deacetylase	3q21.3-q25.2	3:153014551-153028966(+)
AADACL1	KIAA1363-like protein	3q26.31	3:173831130-173911702(-)
ABHD10	hypothetical protein	3q13.2	3:113180589-113194896(+)
ABHD11	Williams-Beuren syndrome critical region protein 21 epoxide hydrolase	7q11.23	7:72788363-72791120(-)
ABHD14A	hypothetical protein	3p21.1	3:51984124-51990250(+)
ABHD4	abhydrolase domain-containing protein 4	14q11.2	14:22136986-22151097(+)
ABHD5	CGI-58 putative peptidase	3p25.3-p24.3	3:43707379-43735295(+)
ABHD6	epoxide hydrolase	3p21.2	3:58198349-58255499(+)
ABHD7	similar to hypothetical protein FLJ22408	1p22.1	1:92268146-92301672(+)
ABHD8	epoxide hydrolase-like putative peptidase	19p13.11	19:17263941-17275234
ABHD9	hypothetical protein flj22408 (epoxide hydrolase) (Homo sapiens)	19p13.13	19:15198731-15204231(-)
AC116334.1	LOC225445 protein	5q33.1	5:147529489-147535154(+)
ACE	angiotensin-converting enzyme peptidase unit 1 (peptidase unit 1)	17q23	17:58908166-58952935(+)
ACE2	angiotensin-converting enzyme-2	Xp22	X:15489077-15529123(-)
ACHE	acetylcholinesterase	7q22	7:100325552-100331477(-)
ACR	acrosin	22q13-qter	22:49523513-49530590(+)
ACY1	aminoacylase (aminoacylase-1)	3p21.1	3:51992518-51998202(+)
ACY1L2	Mername-AA161 protein	6q15	6:89912488-89932003(+)
ADAM10	ADAM10 peptidase	15q21.3	15:56675802-56829469(-)
ADAM11	ADAM11 protein (ADAM 11 protein)	17q21.3	17:40192094-40214740(+)
ADAM12	ADAM12 peptidase	10q26	10:127693415-128067055(-)
ADAM15	ADAM15 peptidase	1q21.3	1:153290386-153301876(+)
ADAM17	ADAM17 peptidase	2p25	2:9546864-9613368(-)
ADAM18	ADAM18 protein	8p22	8:39561257-39706740(+)
ADAM19	adamalysin-19	5q32-33	5:156836890-156935346(-)
ADAM2	ADAM2 protein (ADAM 2 protein)	8p11.2	8:39720414-39814936(-)
ADAM20	ADAM20 peptidase	14q24.1	14:70058832-70071485(-)
ADAM21	ADAM21 peptidase (Homo sapiens) (ADAM 21 protein)	14q24.1	14:69993970-69996375(+)
ADAM22	ADAM22 protein (ADAM 22 protein)	7q21	7:87401394-87670140(+)
ADAM23	ADAM23 protein	2q33	2:207016613-207191124(+)
ADAM28	ADAM28 peptidase (human-type)	8p21.2	8:24207525-24273005(+)
ADAM29	ADAM29 protein	4q34.2-qter	4:176076134-176135905(+)
ADAM30	ADAM30 peptidase	1p11-p13	1:120237679-120240641(-)
ADAM32	ADAM32 protein	8p11.21	8:39084319-39261592(+)
ADAM33	ADAM33 peptidase	20p13	20:3596617-3610893(-)
ADAM7	ADAM7 protein (GP-83 glycoprotein)	8p21.2	8:24354454-24424839(+)
ADAM8	ADAM8 peptidase	10q26.3	10:134925912-134940362(-)
ADAM9	ADAM9 peptidase	8p11.22	8:38973662-39081934(+)
ADAMDEC1	ADAMDEC1 peptidase	8p21.1	8:24297916-24319471(+)
ADAMTS1	ADAMTS1 peptidase	21q22.1-q22	21:27130479-27139599(-)
ADAMTS10	ADAMTS10 peptidase	19p13.3	19:8551126-8581588(-)
ADAMTS12	ADAMTS12 peptidase	5q35	5:33563043-33928054(-)
ADAMTS13	ADAMTS13 peptidase	9q34	9:135276941-135314329(+)
ADAMTS14	ADAMTS14 peptidase	10q2	10:72102565-72192203(+)
ADAMTS15	ADAMTS15 peptidase	11q25	11:129824079-129848926(+)
ADAMTS16	ADAMTS16 peptidase	5p15	5:5193443-5373412(+)
ADAMTS17	ADAMTS17 peptidase	15q24	15:98329166-98699706(-)
ADAMTS18	ADAMTS18 peptidase	16q23	16:75873929-76026512(-)
ADAMTS19	ADAMTS19 peptidase	5q31	5:128824002-129102275(+)
ADAMTS2	procollagen I N-peptidase	5q23-q24	5:178473457-178704937(-)
ADAMTS20	ADAMTS20 peptidase (Homo sapiens)	12q12	12:42034279-42231991(-)
ADAMTS3	ADAMTS3 peptidase	4q21	4:73365551-73653380(-)
ADAMTS4	ADAMTS4 peptidase	1q31-q32	1:159426163-159435468(-)
ADAMTS5	ADAMTS5 peptidase	21q22.1-q22	21:27212112-27260703(-)
ADAMTS6	ADAMTS6 peptidase	5pter-qter	5:64480322-64813460(-)
ADAMTS8	ADAMTS8 peptidase	11q25	11:129780030-129804098(-)
ADAMTS9	ADAMTS9 peptidase	3p14.2-p14.3	3:64476373-64648405(-)
AEBP1	adipocyte-enhancer binding protein 1	7p13	7:44110485-44120683(+)
AFG3L1	Afg3-like protein 1	16q24	16:88566489 - 88594696
AFG3L2	Afg3-like protein 2	18p11	18:12319108-12367194(-)
AFMID	kynurenine formamidase	17q25.3	17:73695038-73715377(+)
AGA	glycosylasparaginase precursor	4q23-q27	4:178588918-178600585(-)
AGBL2	A430081C19RIK (Mus musculus)-type protein	11p11.2	11:47637721-47692878(-)
AGBL3	Mername-AA213 putative peptidase	7q33	7:134321802-134451158(+)
AGBL4	hypothetical protein flj14442 (Homo sapiens) and similar	1p33	1:48771114-50262172(-)
AGRN	RECK protein inhibitor unit 1 (AGRIN/AGRN protein)	1p36.3-p32/1p36.33	1:945366-981355(+)
AGT	angiotensinogen	1q42-q43	1:228904897-228916564(-)
AGTPBP1	Mername-AA217 hypothetical peptidase	9q22.1	9:87351275-87546709(-)
AHSG	alpha-2-HS-glycoprotein inhibitor unit 1	3q27	3:187813549-187821786(+)
AL021920.1	brain-rescue-factor-1 (Homo sapiens)	1p36.13	1:16953992-16963562(-)
AMBP	bikunin inhibitor unit 1	9q32-q33	9:115862231-115880536(-)
ANPEP	aminopeptidase N	15q25-q26	15:88129124-88159098(-)
APEH	acylaminoacyl-peptidase	3p21	3:49686439-49695935(+)
APLP2	amyloid-like protein 2	11q24	11:129445011-129519910(+)
APP	protease nexin 2	21q21.3	21:26174733-26465003(-)
ASNS	asparagine synthetase	7q21.3	7:97319379-97339732(-)
ASRGL1	isoaspartyl dipeptidase (threonine type)	11q12.3	11:61861501-61917454(+)
ASTL	ovastacin	2q11.1	2:96153316-96167902(-)
ATG4A	autophagin-2	Xq22.1-22.3	X:107221590-107284549(+)
ATG4B	autophagin-1	2q37.3	2:242225291-242261942(+)
ATG4C	autophagin-3	1p31.3	1:63022394-63103772(+)
ATG4D	autophagin-4	19p13.2	19:10515593-10525093(+)
ATXN3	ataxin-3	14q24.3-q32.2	14:91598883 - 91642707
AZU1	azurocidin (azurocidin)	19p13.3	19:776097-783017(+)
BACE1	memapsin-2	11q23.3-q24.1	11:116661627-116692182(-)
BACE2	memapsin-1	21pter-qter	21:41461598-41570378(+)
BAP1	ubiquitinyl hydrolase-BAP1 (KIAA0272 protein)	3p21.2-p21.31	3:52410069-52419058(-)
BAT5	protein bat5	6p12.33	6:31787832-31804300
BCAN	family I63 unassigned peptidase inhibitor homologues	1q31	1:154878357-154895939(+)
BCHE	cholinesterase	3q26.1-q26.2	3:166973387-167037944(-)
BF	complement factor B	6p21.3	6:32021406-32027840(+)
BIRC1	BIRC-1 protein	5q13.1	5:70300066-70356270(-)
BIRC2	BIRC-2 protein	11q22	11:101723176-101754604(+)
BIRC3	BIRC-3 protein	11q22	11:101693404-101713658(+)
BIRC4	XIAP caspase inhibitor	Xq25	X:122821729-122875503(+)
BIRC5	survivin	17q25	17:73721872-73733310(+)
BIRC6	BIRC-6 protein	2p22-p21	2:32435234-32697467(+)
BIRC7	BIRC-7 protein	20q13.3	20:61337680-61342292(+)
BIRC8	BIRC-8 protein	19q13.3-q13.4	19:58484729-58485439(-)
BLMH	bleomycin hydrolase (animal)	17q11.1-q11.2	17:25599349-25643204(-)
BMP1	procollagen C-peptidase	8p21	8:22078645-22125782(+)
BPHL	valacyclovir hydrolase	6p25	6:3063609-3098427(+)
C13orf6	FLJ1 putative peptidase	13q33.3	13:107668764-107684603(+)
C14orf29	C14orf29 protein	14q22.1	14:50402270-50441438(+)
C15orf16	Cezanne-2 peptidase	15q13.1	15:29562621-29734834(-)
C19orf27	Mername-AA194 putative peptidase	19p13.3	19:1827976-1836500(-)
C1R	complement component activated C1r	12p13	12:7138294-7153069
C1RL	complement component C1r-like peptidase	12p13.31	12:7138294-7153069(-)
C1S	complement component activated C1s	12p13	12:7038278-7048594(+)
C2	complement component C2a	6p21.3	6:32003473-32021428(+)
C20orf135	protein similar to Mus musculus chromosome 20 open reading frame 135	20q13.33	20:61963295-61964785(+)
C20orf137 /SPINT4	9230105I15Rik protein (Mus musculus) and similar	20q13.12	20:43811968-43812120
C20orf22	Mername-AA196 putative peptidase	20p11.1	20:25223380-25319477(-)
C3	complement component C3 (complement component C3)	19p13.3-p13.2	19:6628846-6671662(-)
C4A	complement component C4	6p21.3	6:32076800-32111173(+)
C4orf20	UfSP2 peptidase	4q35.1	4:186558437-186584062(-)
C5	complement component C5 (complement component C5)	9q34.1	9:122754437-122852375(-)
C6orf103	hypothetical protein flj40251	6q24.2	6:146961829-147178291(+)
C9orf3	aminopeptidase O	9q22.32	9:96528804-96889261(+)
C9orf77	Mername-AA197 putative peptidase	9q21.12	9:73667188-73715968(-)
CAD	dihydro-orotase (N-terminal unit) (Homo sapiens-type)	2p22-p21	2:27293762-27320158(+)
CAPN1	calpain-1	11q13	11:64705919-64736052(+)
CAPN10	calpain-10	2q37.3	2:241174818-241205088(+)
CAPN11	calpain-11	6p12	6:44234526-44260117(+)
CAPN12	calpain-12	19q13.2	19:43912672-43926954(-)
CAPN13	calpain-13	2p21-22	2:30799146-30883815(-)
CAPN14	calpain-14	2p23.1-p21	2:31249426-31310228
CAPN2	calpain-2	1q41-q42	1:221966824-222030341(+)
CAPN3	calpain-3	15q15.1-q21.1	15:40427593-40491807(+)
CAPN5	calpain-5	11q14	11:76455640-76514844(+)
CAPN6	calpamodulin	Xq23	X:110374987-110400407(-)
CAPN7	calpain-7	3p24	3:15222737-15269426(+)
CAPN8	calpain-8	1q41	1:221866556-221920053
CAPN9	calpain-9	1q42.11-q42.3	1:228949753-229004372(+)
CASP1	caspase-1	11q22.2-q22.3	11:104401458 - 104477368
CASP10	caspase-10	2q33-q34	2:201755866-201802355(+)
CASP14	caspase-14	19p13.1	19:15024015-15027900(+)
CASP2	caspase-2	7q34-q35	7:142695524-142714906(+)
CASP3	caspase-3	4q33-q35.1	4:185785844-185807623(-)
CASP4	caspase-4	11q22.2-q22.3	11:104318804-104345373(-)
CASP5	caspase-5	11q22.2-q22.3	11:104370180-104384957(-)
CASP6	caspase-6	4q25	4:110829234-110844078(-)
CASP7	caspase-7	10q25.1-q25.2	10:115428925-115480652(+)
CASP8	caspase-8	2q33-q34	2:201806411-201860679(+)
CASP9	caspase-9	1p36.1-p36.3	1:15687322-15723527(-)
CAST	calpastatin inhibitor unit 2 (unit 2)	5q14-q22	5:96023533-96136143(+)
CD109	antigen CD109	6q14.1	6:74462235-74594761(+)
CD74	MHC II invariant chain p41 form	5q32	5:149761426-149772685(-)
CD97	CD97 antigen	19p13	19:14353213-14380531(+)
CEL	bile salt-dependent lipase	9q34.3	9:134927186-134936972(+)
CELSR2	cadherin EGF LAG seven-pass G-type receptor 2 precursor (Homo sapiens)	1p21	1:109594164-109619895(+)
CES1	liver carboxylesterase	16q13-q22.1	16:54394267-54424576(-)
CES2	carboxylesterase 2	16q22.1	16:65525848-65536473(+)
CES3	carboxylesterase 3	16q22.1	16:65552639 - 65566553
CES7	hypothetical protein flj33678	16q12.2	16:54437629-54466783(-)
CFLAR	FLIP protein	2q33.1	2:201689135-201737246
CLPP	peptidase Clp (type 3)	19p13.3	19:6312463-6319915(+)
CMA1	chymase (human-type)	14q11.2	14:24044552-24047311(-)
CNDP1	carnosine dipeptidase I	18q22.3	18:70352672-70403237(+)
CNDP2	carnosine dipeptidase II	18q22.3	18:70314577-70339336(+)
COL6A3	collagen alpha 3(VI) chain (collagen type VI; alpha 3 chain)	2q37	2:237897401-237987559(-)
COL7A1	collagen alpha 1(VII) chain (collagen alpha 1(VII) chain)	3p21.3	3:48576510-48607689(-)
COPS5	Jab1/MPN domain metalloenzyme	8q13.1	8:68117871-68137116(-)
COPS6	COP9 signalosome subunit 6	7q22.1	7:99524519-99527756(+)
CORIN	corin	4p13-p12	4:47290775-47534816(-)
CPA1	carboxypeptidase A1	7q32	7:129807468-129815165(+)
CPA2	carboxypeptidase A2	7q32	7:129693939-129716870(+)
CPA3	carboxypeptidase A3	3q21-q25	3:150065771-150097558(+)
CPA4	carboxypeptidase A4	7q32	7:129720229-129751249(+)
CPA5	carboxypeptidase A5	7q32	7:129771892-129795807(+)
CPA6	carboxypeptidase A6	8q12.3	8:68496963-68821134(-)
CPAMD8	family I39 unassigned peptidase inhibitor homologues (VIP protein)	19p13.11	19:16864765-16998625(-)
CPAMD9	family I39 unassigned peptidase inhibitors (A2ML1 protein)	12p13.31	12:8866417 - 8920646
CPB1	carboxypeptidase B	3q24	3:150028131-150060633(+)
CPB2	carboxypeptidase U	13q14.11	13:45525323-45577169(-)
CPD	metallocarboxypeptidase D peptidase unit 1 (peptidase unit 1)	17p11.1-q11.2	17:25730110-25819825(+)
CPE	carboxypeptidase E	4q32.3	4:166519540-166638926(+)
CPM	carboxypeptidase M	12q15	12:67531227-67612891(-)
CPN1	carboxypeptidase N	10q24.2	10:101792055-101831632(-)
CPO	metallocarboxypeptidase O	2q34	2:207512523-207542443(+)
CPVL	vitellogenic carboxypeptidase-like protein (WUGSC:H_RG113D17.1 protein)	7p14-p15.3	7:29001374-29152638(-)
CPXM	carboxypeptidase-like protein X1	20p12.3-p13	20:2722715-2729282(-)
CPXM2	cytosolic carboxypeptidase	10q26.13	10:125462782-125641490(-)
CPZ	metallocarboxypeptidase Z	4p16.1	4:8645287-8672388(+)
CRIM1	family I15 unassigned peptidase inhibitor homologues	2p21	2:36436901-36631781(+)
CRMP1	dihydropyrimidinase related protein-1	4p16.1-p15	4:5873393-5945686(-)
CSPG2	family I63 unassigned peptidase inhibitor homologues	5q14.3	5:82803339-82912737(+)
CST1	cystatin SN	20p11.21	20:23676191-23679905(-)
CST11	subfamily I25B unassigned peptidase inhibitor homologues (SC13)	20p11.21	20:23379041-23381482(-)
CST2	cystatin SA	20p11.21	20:23752406-23755368(-)
CST3	cystatin C	20p11.2	20:23556534-23567110(-)
CST4	cystatin S	20p11.2	20:23614269-23617677(-)
CST5	cystatin D	20p11.21	20:23804572-23808380(-)
CST6	cystatin E/M	11q13	11:65536038-65537551(+)
CST7	cystatin F	20p11.21	20:24877866-24888562(+)
CST8	cystatin-related epididymal spermatogenic protein	20p11.21	20:23419766-23424655(+)
CST9	subfamily I25B unassigned peptidase inhibitor homologues (cystatin 9)	20p11.21	20:23531051-23534513(-)
CST9L	subfamily I25B unassigned peptidase inhibitor homologues (cystatin 9-like)	20p11.21	20:23493375-23497386(-)
CSTA	cystatin A	3q21	3:123526701-123543501(+)
CSTB	cystatin B	21q22.3	21:44016826-44020585(-)
CSTL1	subfamily I25B unassigned peptidase inhibitor homologues (dJ322G13.4 protein)	20p11.21	20:23368322-23373567(+)
CTRB1	chymotrypsin B	16q23.2-q23.3	16:73810372-73816316(+)
CTRC	chymotrypsin C	1p36.21	1:15637522-15652128(+)
CTRL	chymopasin	16q22.1	16:66520975-66523266(-)
CTSB	cathepsin B	8p22	8:11737442-11763055(-)
CTSC	dipeptidyl-peptidase I	11q14.1-q14.3	11:87666421-87710586(-)
CTSD	cathepsin D	11p15.5	11:1730561-1741798(-)
CTSE	cathepsin E	1q31	1:204484082-204498727(+)
CTSF	cathepsin F	11q13.1-q13.3	11:66087512-66092623(-)
CTSG	cathepsin G	14q11.2	14:24112564-24115306(-)
CTSH	cathepsin H	15q24-q25	15:77001162-77024475(-)
CTSK	cathepsin K	1q21	1:149035311-149047436(-)
CTSL	cathepsin L	9q21-q22	9:89530254-89536200(+)
CTSL2	cathepsin V	9q22.2	9:98834760-98841413(-)
CTSL3	cathepsin L propeptide	9q22.1	9:89577650-89591619(+)
CTSLL1	cathepsin L-like pseudogene 1 (Homo sapiens) (pseudogene)	10q23.2	10:89136422 - 89139940
CTSLL2	cathepsin L-like peptidase 2	10q11.22	10:47772068-47779668
CTSLL3	cathepsin L-like peptidase 3	9q22.1	9:89648888..89652055
CTSO	cathepsin O	4q31-q32	4:157064728-157094498(-)
CTSS	cathepsin S	1q21	1:148969175-149004929(-)
CTSW	cathepsin W	11q13.1	11:65403860-65407788(+)
CTSZ	cathepsin X	20q13	20:56990585-57015697(-)
CXorf53	Mername-AA166 peptidase	Xq28	X:153952889-154004543(+)
CYLD	CylD protein	16q12.1	16:49333462-49393347(+)
CYMP	chymosin	1p13.3	1:110824911-110835414
DAG1	dystroglycan	3p21.31	3:49482595-49548048
DF	complement factor D	19p13.3	19:810665-814606(+)
DHH	Desert hedgehog protein	12q12-13.1	12:47769475-47774869(-)
DNPEP	aspartyl aminopeptidase	2q36.1	2:219946512-219961842(-)
DPEP1	membrane dipeptidase	16q24.3	16:88214501-88232365(+)
DPEP2	membrane-bound dipeptidase-2	16q22.1	16:66578798-66590857(-)
DPEP3	membrane-bound dipeptidase-3	16q22.1	16:66567068-66571953(-)
DPP10	dipeptidylpeptidase homologue DPP10	2q12.3-2q14.2	2:115636004-116318406(+)
DPP3	dipeptidyl-peptidase III	11q12-q13.1	11:66004456-66057660(+)
DPP4	dipeptidyl-peptidase IV (eukaryote)	2q23-qter	2:162557005-162639298(-)
DPP6	dipeptidylpeptidase homologue DPP6	7q36.2	7:153380839-154316927(+)
DPP7	dipeptidyl-peptidase II	9q34.3	9:139124814-139129016(-)
DPP8	dipeptidyl-peptidase 8	15q22	15:63525051-63597088(-)
DPP9	dipeptidyl-peptidase 9	19p13.3	19:4626238-4674875(-)
DPYS	dihydropyrimidinase	8q22	8:105460829-105548453(-)
DPYSL2	dihydropyrimidinase related protein-2	8p22-p21	8:26491327-26571607(+)
DPYSL3	dihydropyrimidinase related protein-3	5q32	5:146750566-146869614(-)
DPYSL4	dihydropyrimidinase related protein-4	10q26	10:133850394-133869256(+)
DPYSL5	dihydropyrimidinase related protein-5	2p23.3	2:26924467-27024572(+)
ECE1	endothelin-converting enzyme 1	1p36.1	1:21417664-21544584(-)
ECE2	endothelin-converting enzyme 2	3q26.1-q26.33	3:185450177-185493512(+)
ECEL1	DINE peptidase	2q37.1	2:233052781-233060782(-)
EIF3S3	Mername-AA168 protein	8q24.11	8:117726237-117837243(-)
EIF3S5	eukaryotic translation initiation factor 3 subunit 5	11p15.4	11:7965460-7976283(+)
ELA1	pancreatic elastase II form B (Homo sapiens) (IIB)	12q13	1:15675183-15690479(+)
ELA2	elastase-2	19p13.3	19:803291-807242(+)
ELA3A	pancreatic endopeptidase E	1p36.12	1:22175999-22224238(+)
ELA3B	pancreatic endopeptidase E form B	1p36.12	1:22175999-22224238(+)
EMR1	EGF-like module containing mucin-like hormone receptor-like 1 (Homo sapiens)	19p13.3	19:6838582-6903102(+)
EMR2	EGF-like module containing mucin-like hormone receptor-like 2	19p13.1	19:14704205-14750353(-)
EMR3	EGF-like module containing mucin-like hormone receptor-like 3	19p13.1	19:14591052-14646810(-)
EMR4	EGF-like module containing mucin-like hormone receptor-like 4	19p13.3	19:6908004-6941857(-)
ENPEP	aminopeptidase A	4q25	4:111616697-111702812(+)
EPHX1	epoxide hydrolase (epoxide hydrolase)	1q42.1	1:224064452-224099883(+)
EPHX2	cytosolic epoxide hydrolase	8p21-p12	8:27404562-27458403(+)
ESD	esterase D (Homo sapiens)	13q14.1-q14.2	13:46243393-46269368(-)
ESPL1	separase	12q13.13	12:51948818-51973694(+)
F10	coagulation factor Xa	13q34	13:112825114-112851842(+)
F11	coagulation factor XIa	4q35	4:187424112-187447829(+)
F12	coagulation factor XIIa	5q33-qter	5:176761747-176769183(-)
F2	thrombin (F2 protein)	11p11-q12	11:46697331-46717631(+)
F7	coagulation factor VIIa	13q34	13:112808106-112822993(+)
F9	coagulation factor IXa (F9 protein)	Xq27.1-q27.2	X:138440561-138473283(+)
FAP	fibroblast activation protein alpha subunit	2q23	2:162735448-162808291(-)
FCAR	immunoglobulin alpha Fc receptor	19q13.2-q13.4	19:60077361-60093651(+)
FCGBP	family I8 unassigned peptidase inhibitor homologues	19q13.1	19:45045804 - 45132373
FETUB	subfamily I25 unassigned peptidase inhibitor homologues (fetuin-B)	3q27	3:187840843-187853488(+)
FOLH1	glutamate carboxypeptidase II	11p11.2	11:89011995-89071531(+)
FST	follistatin (follistatin)	5q11.2	5:52812174-52817659(+)
FSTL1	follistatin-related protein 1 (follistatin-related protein 1)	3q13.33	3:121595817-121652533(-)
FSTL3	follistatin-related protein 3 (follistatin-like 3)	19p13	19:627389-634392(+)
FSTL4	family I1 unassigned peptidase inhibitor homologues	5q31.1	5:132560051 - 132976122
FSTL5	KIAA1263 protein (KIAA1263 protein)	4q32.3	4:162524501-163304636(-)
FURIN	furin	15q25-q26	15:89212889-89227691(+)
GDA	guanine aminohydrolase	9q21.11-21.33	9:73954113-74058296(+)
GFPT1	glutamine-fructose-6-phosphate transaminase 1 (glucosamine-fructose-6-phosphate aminotransferase)	2p13	2:69405907-69467886(-)
GFPT2	glutamine:fructose-6-phosphate amidotransferase	5q34-q35	5:179660296-179712931(-)
GGH	gamma-glutamyl hydrolase	8q12.23-q13.1	8:64090197-64113965(-)
GGT1	gamma-glutamyltransferase 1 (mammalian) (1)	22q11.23	22:23309718-23354972(+)
GGT2	gamma-glutamyltransferase 2 (Homo sapiens) (2)	22q11.23	22:19892294-19910582(-)
GGTL3	gamma-glutamyltransferase-like protein 3	20q11.22	20:32896184-32924322(-)
GGTL4	gamma-glutamyltransferase-like protein 4 (m-type 3)	20p11.21	20:23913687-23917416
GGTLA1	gamma-glutamyltransferase 5 (mammalian) (5)	22q11.23	22:22945628-22971100
GGTLA3	subfamily I25B unassigned peptidase inhibitor homologues (GGTLA3)	20p11.21	20:23909222 - 23909371
GMPS	guanine 5"-monophosphate synthetase	3q24	3:157071019-157138215(+)
GP6	family I43 unassigned peptidase inhibitor homologues (platelet glycoprotein VI-1)	19q13.4	19:60216885 - 60241444
GPR112	G protein-coupled receptor 112 (GPR112 protein)	Xq26.3	X:135210788-135326713(+)
GZMA	granzyme A	5q11-q12	5:54434230-54441818(+)
GZMB	granzyme B, human-type	14q11.2	14:24170017-24173313(-)
GZMH	granzyme H	14q11.2	14:24145534-24148704(-)
GZMK	granzyme K	5q11-q12	5:54355864-54365717(+)
GZMM	granzyme M	19p13.3	19:495027-500919(+)
HABP2	hyaluronan-binding peptidase	10q25.3	10:115302775-115339348(+)
HGF	hepatocyte growth factor	7q21.1	7:81169381-81237388(-)
HGFAC	hepatocyte growth factor activator	4p16	4:3413447-3421020(+)
HM13	impas 1 peptidase	20q11.21	20:29565892-29621031(+)
HP	haptoglobin-1	16q22.1	16:70646009-70652458(+)
HPN	hepsin	19q11-q13.2	19:40223250-40249315(+)
HPR	haptoglobin-related protein	16q22.1	16:70654624-70668645(+)
HRG	histidine-rich glycoprotein inhibitor unit 1 (unit 1)	3q27	3:187866492-187878716(+)
HTRA3	HtrA3 peptidase	4p16.1	4:8322392-8359738(+)
HTRA4	HtrA4 peptidase	8p11.23	8:38950862-38964868(+)
IDE	insulysin	10q23-q25	10:94204019-94323813(-)
IF	complement factor I	4q24-q25	4:110881297-110942783(-)
IGFBP1	insulin-like growth factor binding protein	7p13-p12	7:45894484-45899791(+)
IGFBP2	insulin-like growth factor binding protein 2	2q33-q34	2:217206372-217237404(+)
IGFBP3	insulin-like growth factor binding protein 3	7p13-p12	7:45918375-45927396(-)
IGFBP4	family I31 unassigned peptidase inhibitor homologues (insulin-like growth factor binding protein 4)	17q12-q21.1	17:35853202-35867507(+)
IGFBP5	insulin-like growth factor binding protein 3 (insulin-like growth factor binding protein 5)	2q33-q36	2:217245074-217268516(-)
IGFBP6	insulin-like growth factor binding protein 3 (insulin-like growth factor binding protein 6)	12q13	12:51777703-51782395(+)
IGSF1	family I43 unassigned peptidase inhibitor homologues (KIAA0364 protein)	Xq25	X:130235161-130361358(-)
IHH	Indian hedgehog protein	2q33-q35	2:219627393-219633433(-)
IMMP2L	mitochondrial inner membrane peptidase 2	7q31	7:110090346-110948739(-)
KAL1	family I17 unassigned peptidase inhibitor homologues (anosmin 1)	Xp22.32	X:8456915-8660227(-)
KEL	Kell blood-group protein	7q33	7:142348325-142369625(-)
KIAA1815	Fxna peptidase (Rattus norvegicus) (sequence assembled by MEROPS)	9p24	9:5774571-5823081(-)
KIR2DL3	family I43 unassigned peptidase inhibitor homologues (KIR2DL3 protein)	19q13.4	19:59927796-60051835(+)
KIR3DL2	family I43 unassigned peptidase inhibitor homologues	19q13.4	19:60053724-60070474(+)
KLK1	kallikrein 1 (KLK1 protein)	19q13.2-q13.4	19:56014216-56018855(-)
KLK10	kallikrein-related peptidase 10	19q13.33	19:56207813-56215243(-)
KLK11	kallikrein-related peptidase 11	19q13.3-q13.4	19:56217301-56223102(-)
KLK12	kallikrein-related peptidase 12	19q13.3-q13.4	19:56224160-56229960(-)
KLK13	kallikrein-related peptidase 13 (KLK13 protein)	19q19.3-q19.4	19:56251275-56260179(-)
KLK14	kallikrein-related peptidase 14	19q13.3-q13.4	19:56272564-56279314(-)
KLK15	kallikrein-related peptidase 15 (KLK15 protein)	19q13.41	19:56020357-56026591(-)
KLK2	kallikrein-related peptidase 2	19q13.2-q13.4	19:56068501-56075634(+)
KLK3	kallikrein-related peptidase 3	19q13.3-q13.4	19:56049983-56055832(+)
KLK4	kallikrein-related peptidase 4 (KLK4 protein)	19q13.3-q13.4	19:56101420-56105806(-)
KLK5	kallikrein-related peptidase 5	19q13.3-q13.4	19:56138373-56148156(-)
KLK6	kallikrein-related peptidase 6	19q13.3-q13.4	19:56153700-56164741(-)
KLK7	kallikrein-related peptidase 7	19q13.3-q13.4	19:56171541-56179106(-)
KLK8	kallikrein-related peptidase 8 (KLK8 protein)	19q13.3-q13.4	19:56191076-56196770(-)
KLK9	kallikrein-related peptidase 9 (KLK9 protein)	19q19.3-q19.4	19:56195618-56204649(-)
KLKB1	plasma kallikrein	4q35	4:187385666-187416618(+)
KNG1	kininogen inhibitor unit 2	3q27	3:187917814-187944435(+)
LACTB	LACT-1 peptidase	15q22.1	15:61201072-61221305(+)
LAIR1	family I43 unassigned peptidase inhibitor homologues (leucocyte immunoglobulin-like receptor-1B)	19q13.4	19:59557047-59573977(-)
LAP3	leucyl aminopeptidase (animal)	4p15.33	4:17188025-17218688(+)
LCN7	tubulointerstitial nephritis antigen-related protein	1p34.3	1:31814708-31825870(+)
LGMN	legumain	14q32.1	14:92239910-92467737(-)
LILRA1	family I43 unassigned peptidase inhibitor homologues (leucocyte immunoglobulin-like receptor-6b)	19q13.4	19:59796925-59804352(+)
LILRA2	family I43 unassigned peptidase inhibitor homologues (leucocyte immunoglobulin-like receptor-7)	19q13.4	19:59776630-59790839(+)
LILRA3	family I43 unassigned peptidase inhibitor homologues (immunoglobulin-like transcript 6)	19q13.4	19:59491666-59501764(-)
LILRA4	family I43 unassigned peptidase inhibitor homologues (immunoglobulin-like transcript 7)	19q13.4	19:59536505-59542233(-)
LILRA5	family I43 unassigned peptidase inhibitor homologues (leucocyte immunoglobulin-like receptor-9m1)	19q13.4	19:59510165-59516221
LILRA6	family I43 unassigned peptidase inhibitor homologues (immunoglobulin-like transcript 8)	19q13.42	19:59411959-59419190
LILRB1	family I43 unassigned peptidase inhibitor homologues (leucocyte immunoglobulin-like receptor-1)	19q13.4	19:59793304-59840791(+)
LILRB2	family I43 unassigned peptidase inhibitor homologues (leucocyte immunoglobulin-like receptor-2)	19q13.4	19:59469487-59476851(-)
LILRB3	family I43 unassigned peptidase inhibitor homologues (LILRB3 protein)	19q13.42	19:59412549-59438942
LILRB4	family I43 unassigned peptidase inhibitor homologues (leucocyte immunoglobulin-like receptor-5)	19q13.4	19:59865391-59873622(+)
LILRB5	family I43 unassigned peptidase inhibitor homologues (LILRB5 protein)	19q13.4	19:59446085-59452979(-)
LIPE	hormone-sensitive lipase	19q13.2	19:47597499-47623418(-)
LMLN	leishmanolysin-2	3q29	3:199171468-199254988(+)
LNPEP	cystinyl aminopeptidase	5q15	5:96296854-96390871(+)
LPA	apolipoprotein	6q27	6:160872505-161007397(-)
LRDD	PIDD auto-processing protein unit 1	11p15.5	11:789180-795245(-)
LTA4H	leukotriene A4 hydrolase (LTA4H protein)	12q22	12:94918742-94953496(-)
LTF	lactoferrin (unit 1)	3q21-q23	3:46452503-46481404(-)
LXN	latexin	3q25.31	3:159866900-159873176(-)
LY75	family I63 unassigned peptidase inhibitor homologues	2q24.1	2:160368122-160469493
MALT1	paracaspase	18q21	18:54489598-54568350(+)
MAP1D	Mername-AA021 peptidase	2q31.1	2:172572736-172654009(+)
MASP1	mannan-binding lectin-associated serine peptidase-3	3q27-q28	3:188418632-188492446(-)
MASP2	mannan-binding lectin-associated serine peptidase 2	1p36.3-p36.2	1:11008649-11029876(-)
MBTPS1	site-1 peptidase	16q24	16:82644872-82708018(-)
MBTPS2	S2P peptidase	Xp21.11-12	X:21767675-21810794(+)
MELL1	neprilysin-2	1p36	1:2511941-2554289(-)
MEP1A	meprin alpha subunit (alpha)	6p12.3	6:46869085-46915478
MEP1B	meprin beta subunit (beta)	18q12.2-q12.3	18:28023985-28054362(+)
MER000146	pancreatic elastase II	1p36.21	1:15655811-15671167(+)
MER002968	leukocyte-derived arginine aminopeptidase	5q15	5:96237960-96279365
MER005244	plasma glutamate carboxypeptidase (hematopoietic lineage switch 2)	8q22.2	8:97726675-98224894(+)
MER005331	aminopeptidase PILS	5q15	5:96122270-96169648(-)
MER011907	aminopeptidase AMZ2	17q24.3	17:63755310-63776634(+)
MER013463	aminopeptidase P homologue	22q13.31-q13.33	22:39583040-39653824(+)
MER014054	Mername-AA031 peptidase	7q34	7:141598442-141604355(-)
MER014970	peroxisomal Lon peptidase	16q12.1	16:46835712-46944908(+)
MER016130	intestinal serine peptidase (rodent)	16p13.3	16:2829577-2831850(-)
MER016132	LOC136242 gene product	7q34	7:141182555-141187690(-)
MER016346	Mername-AA199	16q21	16:56871403-56886444(-)
MER016347	testis-specific protein TSP50	3p14-p12	3:46728610-46734368(-)
MER017367	Mername-AA195 putative peptidase	15q25.1	15:78774737-78835013(+)
MER019708	impas 2 peptidase	12q24.31	12:119685419-119826534(-)
MER019711	impas 3 peptidase	15q21.2	15:48787031-48845202(-)
MER019712	impas 5 peptidase	17q21.31	17:41278037-41280212(+)
MER019715	impas 4 peptidase	19p13.3	19:2279629-2306099(+)
MER021154	esophagus cancer-related gene-2 (esophagus cancer-related gene-2)	5q32	5:147672183-147675670(+)
MER021865	Mername-AA165 peptidase	10q23.31	10:90629995-90723050(+)
MER021876	Mername-AA158 protein	4q22.2	9:138424931-138438033(+)
MER021898	trypsin C	7q34	7:142158332-142161976(+)
MER021929	marapsin-2	1q42.13	1:226069969-226100751(+)
MER021930	Mername-AA123 peptidase	8p23.1	8:10420491-10433738(+)
MER023245	family I43 unassigned peptidase inhibitor homologues	19q13.42	19:59289745-59297812(-)
MER029079	family I39 unassigned peptidase inhibitor homologues (DKFZp434C0631 protein)	12p11.22	12:31156437-31245435(-)
MER029900	epidermis-specific SP-like putative peptidase	4q31.3	4:152417775-152432055(+)
MER033171	family I43 unassigned peptidase inhibitor homologues (FLJ00060 protein)	19q13.42	19:59735789-59748865(+)
MER033172	family I51 unassigned peptidase inhibitor homologues (phosphatidylethanolamine binding protein)	8p21.3	8:22626710-22841366(-)
MER033174	Mername-AA216 hypothetical peptidase	2p23.3	2:27127995-27146985(+)
MER033182	Mername-AA218 hypothetical peptidase	1q32.1	1:204063777-204085868(-)
MER033184	hypothetical protein like 5730457F11RIK	16p13.3	16:2510428-2519732(+)
MER033187	testis serine peptidase 2 (human-type)	3p21.31	3:46846898-46850589(-)
MER033212	hypothetical protein flj40219	16q22.1	16:65552639-65566552(+)
MER033240	hypothetical protein flj37464	16q22.1	16:65580134-65601162(+)
MER033253	hypothetical acrosin-like peptidase (Homo sapiens)	2q14.1	2:114141526-114142670(-)
MER033263	Ccg1-interacting factor b	3p21.31	3:51977574-51983122(-)
MER037853	protein phosphatase methylesterase 1	11q13.4	11:73559946-73644654(+)
MER042724	UfSP1 peptidase	7q22.1	7:100324400-100325065(-)
MER047044	ADAM6 protein (deduced from nucleotide sequence by MEROPS)	14q32.33	14:105506864 - 105509403
MER052595	aminopeptidase Q	5q23.1	5:115326170-115391199(+)
MER058242	aminopeptidase AMZ1	7p22.2	7:2685689-2721587(+)
MER066474	DKFZp586H2123-like protein	11p13	11:35409956-35504155(-)
MER078640	carbamoyl-phosphate synthase (Homo sapiens-type) (CPS1 protein)	2q35	2:211129583-211252074(+)
MER100794	acid ceramidase precursor	8p22-21.2	8:17958214-17986787(-)
MER115261	ATXN3L g.p. (Homo sapiens)	Xp22	X:13246276-13247992(-)
MER124612	latrophilin 3	4q13.1	4:62045434-62620763
MER126380	latrophilin-1	19p13.2	19:14119549-14177997
MEST	mesoderm specific transcript protein	7q32	7:129913282-129933365(+)
METAP1	methionyl aminopeptidase 1	4q23	4:100135903-100202976(+)
METAP2	methionyl aminopeptidase 2	12q22	12:94391953-94433746(+)
MFI2	melanotransferrin domain 1 (unit 1)	3q28-q29	3:198214640-198241043(-)
MGLL	monoglyceride lipase	3q21.3	3:128890601-129040709(-)
MIPEP	mitochondrial intermediate peptidase	13q12	13:23202329-23361559(-)
MME	neprilysin	3q21-q27	3:156280882-156380971(+)
MMP1	matrix metallopeptidase-1	11q22-q23	11:102165861-102174104(-)
MMP10	matrix metallopeptidase-10 (human type)	11q22.3-q23	11:102146455-102156569(-)
MMP11	matrix metallopeptidase-11	22q11.2	22:22445036-22456502(+)
MMP12	matrix metallopeptidase-12	11q22.2-q22.3	11:102238686-102250922(-)
MMP13	matrix metallopeptidase-13	11q22.3	11:102318937-102331672(-)
MMP14	membrane-type matrix metallopeptidase-1	14q11-q12	14:22375633-22386642(+)
MMP15	membrane-type matrix metallopeptidase-2	16q13-q21	16:56616783-56638303(+)
MMP16	membrane-type matrix metallopeptidase-3	8q21	8:89118580-89408825(-)
MMP17	membrane-type matrix metallopeptidase-4	12q24.3	12:130878891-130902269(+)
MMP19	matrix metallopeptidase-19	12q14	12:54515511-54523002(-)
MMP2	matrix metallopeptidase-2	16q13	16:54070589-54098101(+)
MMP20	matrix metallopeptidase-20	11q22.3	11:101952776-102001273(-)
MMP21	matrix metallopeptidase-21	10q26.2	10:127445019-127454380(-)
MMP23A	matrix metallopeptidase-23A	1p36.3	1:1557421-1559893(+)
MMP23B	matrix metallopeptidase-23B	1p36.3	1:1557421-1559893(+)
MMP24	membrane-type matrix metallopeptidase-5	20q11.2	20:33278095-33328218(+)
MMP25	membrane-type matrix metallopeptidase-6	16p13.3	16:3036683-3050728(+)
MMP26	matrix metallopeptidase-26	11p15	11:4745076-4970235(+)
MMP27	matrix metallopeptidase-22	11q24	11:102067625-102081678(-)
MMP28	matrix metallopeptidase-28	17q21.1	17:31116989-31146753(-)
MMP3	matrix metallopeptidase-3	11q23	11:102211738-102219552(-)
MMP7	matrix metallopeptidase-7	11q21-q22	11:101896450-101906688(-)
MMP8	matrix metallopeptidase-8	11q21-q22	11:102088599-102100868(-)
MMP9	matrix metallopeptidase-9	20q11.2-q13.1	20:44070954-44078606(+)
MMPL1	matrix metallopeptidase-like 1	16p13.3	16:3036683-3050728(+)
MRC1	family I63 unassigned peptidase inhibitor homologues	10p12.33	10:18138358-18240097(+)
MRC2	family I63 unassigned peptidase inhibitor homologues	17q23.3	17:58058494-58124685(+)
MRPL38	family I51 unassigned peptidase inhibitor homologues (KIAA1863 protein)	17q25.3	17:71406319-71437805(-)
MST1	hepatocyte growth factor-like protein homologue (hepatocyte growth factor-like protein homologue)	1p36,13	1:16953992-16963562
MUC1	MUC1 self-cleaving mucin	1q22	1:153424924 - 153429330
MUC2	family I8 unassigned peptidase inhibitor homologues	11p15.5	11:1064875-1087720(+)
MUC5AC	mucin	11p15	11:1152663-1178939(+)
MUC5B	mucin 5B	11p15	11:1200930-1239684(+)
MUC6	mucin 6	11p15.5-p15.4	11:1002824 - 1026706
MYSM1	Mername-AA167 peptidase	1p32.1	1:58893000-58938312(-)
NAALAD2	glutamate carboxypeptidase III	11q14.3-q21	11:89507491-89565416(+)
NAALADL1	NAALADASE L peptidase	11q12	11:64568873-64582585(-)
NAALADL2	glutamate carboxypeptidase II (Homo sapiens)-like protein	3q26.31	3:176297261-177006120(+)
NAPSA	napsin A	19q13.33	19:55553547-55560743(-)
NAPSB	napsin B pseudogene (napsin B pseudogene)	19q13.33	19:55528871-55539830(-)
NCLN	nicalin	19p13.3	19:3136875-3160572(+)
NDRG1	Mername AA-229 peptidase homologue (Homo sapiens)	8q24.3	8:134318596-134378680(-)
NDRG3	NDRG3 protein	20q11.21-q11.23	20:34713583-34807895(-)
NDRG4	NDRG4 protein	16q21-q22.1	16:57055118-57105024(+)
NID1	family I31 unassigned peptidase inhibitor homologues (nidogen)	1q43	1:234205764-234295104(-)
NID2	family I31 unassigned peptidase inhibitor homologues (osteonidogen)	14q21-q22	14:51541271-51606295(-)
NLGN1	neuroligin 1	3q26.32	3:174805083 - 175483810
NLGN2	neuroligin 2	17p13.2	17:7252226-7263903(+)
NLGN3	neuroligin 3	Xq13.1	X:70281436-70307774(+)
NLGN4X	neuroligin 4, X-linked	Xp22.33	X:5818085-6156706(-)
NLGN4Y	neuroligin 4, Y-linked	Yq11.221	Y:15144026-15466924(+)
NLN	neurolysin	5q12.3	5:65053831-65158495(+)
NPEPL1	Mername-AA014 peptidase	20q13.32	20:56701268-56724307(+)
NPEPPS	cytosol alanyl aminopeptidase	17q12-q21	17:42963603-43055634(+)
NRD1	nardilysin	1p32.3	1:52027472-52117010(-)
NUP98	nucleoporin 145 (NUP98 protein)	11p15.5	11:3652817-3775468(-)
OMA1	metalloprotease-related protein-1	1p32	1:58712133-58785040(-)
OSCAR	family I43 unassigned peptidase inhibitor homologues (OSCAR protein)	19q13.42	19:59289745 - 59297812
OSGEP	Kae1 putative peptidase	14q11.1	14:19985056-19993038(-)
OSGEPL1	Mername-AA018 peptidase	2q32.3	2:190319631-190336169(-)
OTUB1	otubain-1	11q13.1	11:63509901-63522468(+)
OTUB2	otubain-2	14q32.13-q32.2	14:93562477-93585025(+)
OTUD5	DUBA deubiquitinylating enzyme	Xp11.23	X:48664432-48699837(-)
OVCH1	ovochymase-1 domain 1	12p11.22/12p11.23	12:29471771 - 29541886
OVCH2	ovochymase-2	11p15.4	11:7669020 - 7684517
PA2G4	proliferation-association protein 1 (proliferation-associated protein 1)	12q13	12:54784628-54793912(+)
PAPLN	papilin (MGC50452)	14q24.1	14:72774008-72811098(+)
PAPPA	pappalysin-1	9q33.1	9:117955892-118204420(+)
PAPPA2	pappalysin-2	1q23-q25	1:174698930-175078591(+)
PARK7	DJ-1 putative peptidase	1p36.2-p36.3	1:7944310-7967926(+)
PBP	phosphatidylethanolamine-binding protein (prostatic binding protein)	12q24.23	12:117058253-117067770(+)
PCSK1	proprotein convertase 1	5q15-q21	5:95751875-95794708(-)
PCSK1N	proSAAS	Xp11.23	X:48574450-48578984(-)
PCSK2	proprotein convertase 2	20p11.2	20:17154752-17413223(+)
PCSK4	proprotein convertase 4	19p13.3	19:1432427-1441407(-)
PCSK5	proprotein convertase 5	9q21.13	9:77695406-78163658(+)
PCSK6	PACE4 proprotein convertase	15q26	15:99661657-99847396(-)
PCSK7	proprotein convertase 7	11q23-q24	11:116581020-116608021(-)
PCSK9	proprotein convertase 9	1p32.2	1:55277808-55303111(+)
PDDC1	FLJ34283 protein (Homo sapiens)	11p15.5	11:757225-767487(-)
PEPD	Xaa-Pro dipeptidase (eukaryote)	19cen-q13.11	19:38569699-38704522(-)
PFAS	KIAA0361 protein (Homo sapiens)	17p13.1	17:8093362-8114528(+)
PGA3	pepsin A	11q13	11:60746396-60755755(+)
PGA4	pepsin A4 (Homo sapiens)	11q12.2	11:60746397-60755755
PGA5	pepsin A5 (Homo sapiens)	11q13	11:60765245-60775492
PGC	gastricsin	6p21.3-p21.1	6:41799640-41823099(-)
PGPEP1	pyroglutamyl-peptidase I (chordate)	19p13.11	19:18312408-18341763(+)
PHEX	PHEX peptidase	Xp22.2-p22.1	X:21960842-22176397(+)
PI3	elafin	20q12-q13	20:43236912-43238598(+)
PIGK	glycosylphosphatidylinositol:protein transamidase	1p31.1	1:77327254-77457720(-)
PITRM1	eupitrilysin	10p15.2	10:3169922-3205003(-)
PLAT	t-plasminogen activator	8p12	8:42151912-42184351(-)
PLAU	u-plasminogen activator	10q24	10:75340896-75347260(+)
PLG	plasmin	6q26	6:161043260-161094328(+)
PMPCA	mitochondrial processing peptidase non-peptidase alpha subunit (alpha)	9q34.3	9:138424931-138438033(+)
PMPCB	mitochondrial processing peptidase beta-subunit (beta)	7q22-q31.1/7q22.1	7:102725109-102742368(+)
POL3S	polyserase-3 unit 1	16p11.2	16:31002246-31007631(-)
PPAT	amidophosphoribosyltransferase precursor	4q121	4:56954288-56996602(-)
PPGB	serine carboxypeptidase A	20q13.1	20:43952512-43960866(+)
PRCP	lysosomal Pro-Xaa carboxypeptidase	11q14	11:82213058-82289205(-)
PREP	prolyl oligopeptidase	6q22	6:105832199-105957662(-)
PREPL	PREPL A protein	2p21	2:44399407-44440393(-)
PRG2	pro-eosinophil major basic protein	11q12	11:56910843-56914688(-)
PRG3	family I63 unassigned peptidase inhibitor homologues	11q12	11:56900819-56905199(-)
PROC	protein C (activated)	2q13-q14	2:127892487-127903286(+)
PROZ	protein Z (protein Z)	13q34	13:112860969-112874695(+)
PRSS1	cationic trypsin (Homo sapiens-type)	7q35	7:142136897-142140495(+)
PRSS11	HtrA1 peptidase	10q25.3-q26.2	10:124211047-124264413(+)
PRSS12	neurotrypsin	4q25-q26	4:119421865-119493370(-)
PRSS15	PIM1 peptidase	19p13.2	19:5642845-5671176(-)
PRSS16	thymus-specific serine peptidase	6p21.31-p22.2	6:27323487-27332327(+)
PRSS2	trypsin-2 (human-type)	7q35	7:142167698-142182359(+)
PRSS21	testisin	16p13.3	16:2807165-2811721(+)
PRSS22	prosemin	16p13.3	16:2842729-2848172(-)
PRSS23	umbelical vein peptidase	11q14.1	11:86189139-86199923(+)
PRSS25	HtrA2 peptidase	2p12	2:74610040-74614191(+)
PRSS27	marapsin	16p13.3	16:2702424-2710553(-)
PRSS3	mesotrypsin	9p13	9:33740515-33789228(+)
PRSS33	tryptase-6	16p13.3	16:2773955-2777451(-)
PRSS35	dj223e3.1 protein (Homo sapiens)	6q15	6:84278990-84292138(+)
PRSS36	polyserase-2 unit 1	16p11.2	16:31057750-31068888(-)
PRSS7	enteropeptidase	21q21	21:18563561-18697844(-)
PRSS8	prostasin	16p11.2	16:31050255-31054320(-)
PRSSL1	complement factor D-like putative peptidase	19p13.3	19:636548 - 646483
PRTN3	myeloblastin	19p13.3	19:791985-799175(+)
PSARL	Rhomboid-7 peptidase	3q27.3	3:185029870-185085387(-)
PSEN1	presenilin 1	14q24.3	14:72672908-72756862(+)
PSEN2	presenilin 2	1q31-q42	1:225124887-225150422(+)
PSMA1	proteasome subunit alpha 1	11p15.1	11:14482999-14589108(-)
PSMA2	proteasome subunit alpha 2	7p13	7:42922989-42938330(-)
PSMA3	proteasome subunit alpha 3	14q23	14:57781302-57808475(+)
PSMA4	proteasome subunit alpha 4	15q11.2	15:76619824-76628591(+)
PSMA5	proteasome subunit alpha 5	1p13	1:109745997-109770589(-)
PSMA6	proteasome subunit alpha 6	14q13	14:34831314-34856431(+)
PSMA7	proteasome subunit alpha 7 (XAPC7)	20pter-p12.1	20:60145185-60151881(-)
PSMA8	2410072d24rik protein (mouse)	18q11.2	18:21967814-22027317(+)
PSMB1	proteasome subunit beta 1	6q27	6:170686133-170704325(-)
PSMB10	proteasome catalytic subunit 2i	16q22.1	16:66525913-66528254(-)
PSMB2	proteasome subunit beta 2	1p34.2	1:35808000-35879730(-)
PSMB3	proteasome subunit beta 3	17q12	17:34162528-34174003(+)
PSMB4	proteasome subunit beta 4	1q21	1:149638666-149641038(+)
PSMB5	proteasome catalytic subunit 3	14q11.2	14:22564907-22573959(-)
PSMB6	proteasome catalytic subunit 1	17p13	17:4646415-4648744(+)
PSMB7	proteasome catalytic subunit 2	9q34.11-q34.12	9:126155566-126217542(-)
PSMB8	proteasome catalytic subunit 3i	6p21.3	6:32916472-32920690(-)
PSMB9	proteasome catalytic subunit 1i	6p21.3	6:32919891-32955342(+)
PSMD14	Poh1 peptidase	2q24.3	2:161931682-161976472(+)
PSMD7	26S proteasome non-ATPase regulatory subunit 7	16q23-q24	16:72888182-72897685(+)
PZP	pregnancy-zone protein (pregnancy zone protein)	12p13-p12.2	12:9192704-9252233(-)
QPCT	glutaminyl cyclase	2p22.3	2:37425257-37453968(+)
QPCTL	Mername-AA103 peptidase	19q13.32	19:50887772-50898426(+)
RARRES1	family I47 unassigned peptidase inhibitor homologues (RARRES1 protein)	3q25.32	3:159897597-159932969(-)
RBP3	interphotoreceptor retinoid-binding protein unit 1	10q11.2	10:48001495-48010997(-)
RCE1	prenyl peptidase 1 (protein sequence corrected by use of MEROPS EST alignment)	11q13	11:66367459-66370593(+)
RECK	RECK protein inhibitor unit 1 (RECK protein)	9p13-p12	9:36026906-36114448(+)
REG3A	family I63 unassigned peptidase inhibitor homologues	2p12	2:79237641-79240387(-)
REG4	family I63 unassigned peptidase inhibitor homologues	1p13.1-p12	1:120138164-120155726(-)
REN	renin	1q32	1:202390571-202402088(-)
RHBDF1	RHBDF1 protein	16pter-p13	16:48059-62591(-)
RHBDL1	rhomboid-like protein 1	16p13.3	16:665792-668268(+)
RHBDL2	rhomboid-like protein 2	1p35.1	1:39124066-39180043(-)
RHBDL4	ventrhoid transmembrane protein	17q11.2	17:27617308-27675793(+)
RHBDL6	peptidase homologue similar to hypothetical protein FLJ22341	17q25.3	17:71978571-72009103(-)
RHBDL7	rhomboid-like protein 7	7q11.23	7:75346202-75356180(+)
RNPEP	aminopeptidase B	1q32.1-q32.2	1:200218389-200241898(+)
RNPEPL1	Mername-AA050 peptidase	2q37.3	2:241156777-241166814(+)
SCPEP1	RISC peptidase	17q22	17:52410488-52439123(+)
SCRN1	secernin 1	7p14.3-p14.1	7:29926273-29995902(-)
SCRN2	secernin 2 (SCRN2 protein)	17q21.32	17:43270065-43273649(-)
SCRN3	secernin 3 (SCRN3 protein)	2q31.1	2:174968719 - 175001973
SEC11L1	signalase (eukaryote) 18 kDa component	15q25.2	15:83013781-83060678(-)
SEC11L3	signalase (eukaryote) 21 kDa component	18q21.31	18:54958105-54977041(+)
SENP1	SENP1 peptidase	12q13.1	12:46722948-46785886(-)
SENP2	SENP2 peptidase	3q28	3:186786725-186831577(+)
SENP3	SENP3 peptidase	17p13	17:7406043-7416009(+)
SENP5	SENP5 peptidase	3q29	3:198079174-198142480(+)
SENP6	SENP6 peptidase	6q13-q14.3	6:76368320-76483649(+)
SENP7	SENP7 peptidase	3q12	3:102525807-102714757(-)
SENP8	SENP8 peptidase	15q22.32	15:70197808-70220357(+)
SERHL	Loc328574-like protein	22q13.2-q13.31	22:41279869-41300332(+)
SERPINA1	alpha-1-peptidase inhibitor	14q32.1	14:93914451-93926782(-)
SERPINA10	protein Z-dependent peptidase inhibitor	14q32.13	14:93819405-93829361(-)
SERPINA11 /SERPINA9	centerin (SERPINA9 protein)	14q32.2	14:93978554 - 94012423
SERPINA12	vaspin (OL-64 protein)	14q32.2	14:94023374-94053934(-)
SERPINA13	SERPINA13 (LOC122500 protein)	14q32.13	14:94176815-94183084(+)
SERPINA2	serpin A2	14q32.1	14:93900404-93902788(-)
SERPINA3	alpha-1-antichymotrypsin	14q32.1	14:94148387-94160150(+)
SERPINA4	kallistatin (SERPINA4)	14q31-q32.1	14:94097536-94105994(+)
SERPINA5	protein C inhibitor (SERPINA5)	14q32.1	14:94117564-94129200(+)
SERPINA6	corticosteroid-binding globulin (SERPINA6)	14q32.1	14:93840339-93859441(-)
SERPINA7	thyroxin-binding globulin (SERPINA7)	Xq22.2	X:105163853-105169385(-)
SERPINB1	serpin B1	6p25	6:2778641-2787208(-)
SERPINB10	serpin B10	18q21.3	18:59726205-59754325(+)
SERPINB11	serpin B11	18q21	18:59521063 - 59542107
SERPINB12	serpin B12	18q21	18:59374373-59385224(+)
SERPINB13	serpin B13	18q21.3-q22	18:59405580-59417410(+)
SERPINB2	plasminogen activator inhibitor 2	18q21.3	18:59705922-59722100(+)
SERPINB3	squamous cell carcinoma antigen 1	18q21.3	18:59455474-59462482(-)
SERPINB4	squamous cell carcinoma antigen 2	18q21.3	18:59455474 - 59462482
SERPINB5	maspin	18q21.3	18:59295199-59323297(+)
SERPINB6	serpin B6	6p25	6:2893392-2917398(-)
SERPINB7	megsin	18q21.33	18:59571257-59623584(+)
SERPINB8	serpin B8	18q21.3	18:59788238-59807585(+)
SERPINB9	serpin B9	6p25	6:2832507-2848506(-)
SERPINC1	antithrombin	1q23-q25.1	1:172139562-172153096(-)
SERPIND1	heparin cofactor II	22q11.21	22:19458383-19472008(+)
SERPINE1	plasminogen activator inhibitor-1	7q21.3-q22	7:100557172-100569026(+)
SERPINE2	protease nexin-1	2q33-q35	2:224548123-224612237(-)
SERPINF1	pigment epithelium derived factor	17p13.3	17:1612009-1627618(+)
SERPINF2	plasmin inhibitor	17p13	17:1593070-1605310(+)
SERPING1	C1 inhibitor	11q11-q13.1	11:57121603-57138902(+)
SERPINH1	colligin 1	11q13.5	11:74950818-74961492(+)
SERPINI1	neuroserpin	3q26.31	3:168936217-169026048(+)
SERPINI2	serpin I2	3q26.1-q26.2	3:168642417-168674515(-)
SGNE1	secretogranin V	15q13.3	15:30721203-30776584(+)
SHH	Sonic hedgehog protein	7q36	7:155288319-155297728(-)
SLCO1C1	family I1 unassigned peptidase inhibitor homologues	12p12.3	12:20739666-20797585(+)
SLCO2A1	organic anion transporter polypeptide-related	3q21	3:135134236-135231439(-)
SLCO2B1	RECK protein inhibitor unit 1 (SLCO2B1 protein)	11q13	11:74539809-74594945(+)
SLCO3A1	organic anion transporter polypeptide-related	15q26	15:90197950-90507783(+)
SLCO4A1	RECK protein inhibitor unit 1 (SLCO4A1 protein)	20q13.33	20:60744242-60774092(+)
SLCO5A1	organic anion transporter polypeptide-related	8q13.3	8:70747129-70909762(-)
SLCO6A1	family I1 unassigned peptidase inhibitor homologues	5q21.1	5:101735553-101862619(-)
SLPI	secretory leukocyte peptidase inhibitor domain 2	20q12	20:43314293-43316620(-)
SMOC1	family I31 unassigned peptidase inhibitors	14q24.1	14:69415896-69568836(+)
SMOC2	family I31 unassigned peptidase inhibitors (DKFZp667F1519 protein)	6q27	6:168584680-168815214(+)
SOLH	calpain-15	16p13.3	16:517857-544635(+)
SPARC	family I1 unassigned peptidase inhibitor homologues	5q31.3-q32	5:151021212-151046710(-)
SPARCL1	family I1 unassigned peptidase inhibitor homologues	4q22.1	4:88613524-88669530(-)
SPG7	paraplegin	16q24.3	16:88102306-88151674(+)
SPINK1	SPINK1	5q32	5:147184339-147191453(-)
SPINK2	SPINK2	4q12	4:57370785-57382654(-)
SPINK4	SPINK4 protein (SPINK4 protein)	9p12	9:33208363-33238564(+)
SPINK5	SPINK5 inhibitor unit 1 (SPINK5 protein unit 1)	5q32	5:147423728-147497045(+)
SPINK6	SPINK6	5q32	5:147562597-147574892(+)
SPINK7	family I1 unassigned peptidase inhibitor homologues (SPINK7 protein)	5q33.1	5:147672183-147675670(+)
SPINK9	family I1 unassigned peptidase inhibitor homologues	5q33.1	5:147695315-147699605(+)
SPINLW1	eppin-3, inhibitor unit 2 (eppin-3 unit 2)	20q12-q13.2	20:43596250-43609442(-)
SPINT1	hepatocyte growth factor activator inhibitor 1 inhibitor unit 1	15q13.3	15:38923538-38937144(+)
SPINT2	hepatocyte growth factor activator inhibitor 2 inhibitor unit 1	19q13.1	19:43447007-43474927(+)
SPINT3	HKIB9 (HKIB9)	20q13.12	20:43574515-43577678(-)
SPOCK	testican-1 (SPOCK protein)	5q31	5:136338886-136862936(-)
SPOCK1	Spock2 protein	5q31	5:136338886 - 136862936
SPOCK2	testican-2 (testican-2)	10pter-q25.3	10:73488799-73518773(-)
SPOCK3	Spock2 protein (testican-3)	4q32.3	4:167891110-168392316(-)
ST14	matriptase	11q24-q25	11:129534892-129585466(+)
STAMBP	AMSH deubiquitinating peptidase	2p13.1	2:73909594-73943518(+)
SUPT16H	chromatin-specific transcription elongation factor 140 kDa subunit	14q11.2	14:20889478-20922265(-)
TACSTD1	family I31 unassigned peptidase inhibitor homologues (tumor-associated calcium signal transducer 1)	2p21	2:47449954-47467661(+)
TACSTD2	family I31 unassigned peptidase inhibitor homologues (tumor-associated calcium signal transducer 2)	1p32-p31	1:58813683-58816033(-)
TAF2	Tata binding protein associated factor	8q24.12	8:120812196-120914255(-)
TASP1	taspase-1	20p12.1	20:13318037-13567583(-)
TECTA	family I8 unassigned peptidase inhibitor homologues (alpha-tectorin)	11q22-q24	11:120477092-120567412(+)
TESSP1	testis serine peptidase 1	16p13.3	16:2788487-2795134(+)
TF	serotransferrin precursor (domain 1) (unit 1)	3q22.1	3:134901901-134980318(+)
TFPI	tissue factor pathway inhibitor-1 inhibitor unit 1	2q31-q32.1	2:188037202-188127464(-)
TFPI2	tissue factor pathway inhibitor-2 inhibitor unit 1	7q22	7:93353243-93358152(-)
TFR2	transferrin receptor 2 protein (transferrin receptor 2)	7q22	7:100055975-100077109(-)
TFRC	transferrin receptor protein (transferrin receptor)	3q26.2	3:197260553-197293343(-)
TG	thyroglobulin precursor (thyroglobulin)	8q24.2-q24.3	8:133948387-134216325(+)
THOP1	thimet oligopeptidase	19q13.3	19:2736506-2764588(+)
TIMP1	timp-1	Xp11.3-p11.23	X:47326634-47331132(+)
TIMP2	timp-2	17q25	17:74360658-74433067(-)
TIMP3	timp-3	22q12.3	22:31526802 - 31589030
TIMP4	timp-4	3p25	3:12169578-12175851(-)
TINAG	tubulointerstitial nephritis antigen	6p11.2-p12	6:54280723-54362870(+)
TLL1	mammalian tolloid-like 1 protein	4q32-q33	4:167013860-167244443(+)
TLL2	mammalian tolloid-like 2 protein	10q23-q24	10:98114356-98263658(-)
TMEFF1	DKFZP761G1118 protein (DKFZP761G1118 protein)	9q31	9:102229380-102379733(+)
TMEFF2	tomoregulin (tomoregulin)	2q32.3	2:192522014-192767904(-)
TMPRSS11A	HAT-like putative peptidase 2	4q13.3	4:68457704-68511739(-)
TMPRSS11B	Mername-AA221 putative peptidase	4q13.3	4:68774967-68794004(-)
TMPRSS11D	adrenal secretory serine peptidase	4q13.2	4:68369196-68432311(-)
TMPRSS11E	DESC1 peptidase	4q13.3	4:68995795-69045917(+)
TMPRSS11F	Mername-AA181 peptidase	4q13.2	4:68601511-68678182(-)
TMPRSS12	LOC144757 peptidase (Homo sapiens) and similar (protein sequence extended by use of MEROPS EST alignment)	12q13.13	12:49523015-49567928(+)
TMPRSS13	TMPRSS13 peptidase	11q23	11:117276570-117305325(-)
TMPRSS2	epitheliasin	21q22.3	21:41758351-41801948(-)
TMPRSS3	transmembrane peptidase, serine 3	21q22.3	21:42665068-42690024(-)
TMPRSS4	transmembrane peptidase, serine 4	11q23.3	11:117452976-117494380(+)
TMPRSS5	spinesin	11q23.3	11:113065275-113082305(-)
TMPRSS6	matriptase-2	22q13.1	22:35791422-35829639(-)
TMPRSS7	matriptase-3	3q13	3:113241155-113282806(+)
TMPRSS9	polyserase-IA unit 1	19p13.3	19:2340784-2377086(+)
TNFAIP3	tumor necrosis factor alpha-induced protein 3	6q23-q25	6:138230274-138246135(+)
TPP1	tripeptidyl-peptidase I	11p15	11:6590573-6597268(-)
TPP2	tripeptidyl-peptidase II	13q32-q33	13:102047374-102129522(+)
TPSAB1	tryptase alpha	16p13.3	16:1218337-1220186(-)
TPSB2	tryptase beta	16p13.3	16:1230679-1232556(+)
TPSD1	tryptase delta 1 (Homo sapiens)	16p13.3	16:1246061-1248610(+)
TPSG1	tryptase gamma 1	16p13.3	16:1211659-1215257(-)
TRHDE	pyroglutamyl-peptidase II	12q15-q21	12:70952730-71345688(+)
TYSND1	Tysnd1 peptidase	10q22.1	10:71567739-71576502(-)
U66059.1	Mername-AA204 peptidase	7q34	7:141615141-141618551(-)
UCHL1	ubiquitinyl hydrolase-L1	4p14	4:40953685-40965202(+)
UCHL3	ubiquitinyl hydrolase-L3	13q21.2-q22.1	13:75021928-75078067(+)
UCHL5	ubiquitinyl hydrolase-UCH37	1q32	1:191251512-191295751(-)
UQCRC1	ubiquinol-cytochrome c reductase core protein I	3p21.3	3:48611436-48622102(-)
UQCRC2	ubiquinol-cytochrome c reductase core protein II (ubiquinol-cytochrome c reductase core protein 2)	16p12	16:21871482-21902174(+)
USP1	ubiquitin-specific peptidase 1	1p31.3-p32.1	1:62674563-62690061(+)
USP10	ubiquitin-specific peptidase 10 (KIAA0190 protein)	16q23.1	16:83291050-83371026(+)
USP11	ubiquitin-specific peptidase 11	Xp11.23	X:46977258-46992671(+)
USP12	ubiquitin-specific peptidase 12	13q12.13	13:26538293-26643881(-)
USP13	ubiquitin-specific peptidase 13	3q26.2-q26.3	3:180853635-180984675(+)
USP14	ubiquitin-specific peptidase 14	18p11.32	18:148479-203739(+)
USP15	ubiquitin-specific peptidase 15	12q14	12:60940454-61086165(+)
USP16	ubiquitin-specific peptidase 16	21q22.11	21:29318809-29348680(+)
USP18	ubiquitin-specific peptidase 18	22q11.21	22:17012758-17040158(+)
USP19	ubiquitin-specific peptidase 19	3p21.31	3:49120468-49133316(-)
USP2	ubiquitin-specific peptidase 2	11q23.3	11:118732163-118757575(-)
USP20	ubiquitin-specific peptidase 20	9q34.13	9:131637546-131683928(+)
USP21	ubiquitin-specific peptidase 21	1q22	1:159395878-159402137(+)
USP22	ubiquitin-specific peptidase 22	17p13.2	17:20843502-20886944(-)
USP24	ubiquitin-specific peptidase 24	1p32.1	1:55304629-55453374(-)
USP25	ubiquitin-specific peptidase 25	21q11.2	21:16024215-16174248(+)
USP26	ubiquitin-specific peptidase 26 (human-type)	Xq26.2	X:131986325-131989966(-)
USP27X	Mername-AA187 peptidase	Xp11.23	X:49531315 - 49532928
USP28	ubiquitin-specific peptidase 28	11q23	11:113173808-113251466(-)
USP29	ubiquitin-specific peptidase 29	19q13.43	19:62283753-62335106(+)
USP3	ubiquitin-specific peptidase 3	15q22.3	15:61583863-61670712(+)
USP30	ubiquitin-specific peptidase 30	12q23.3	12:107945277-108010214(+)
USP31	ubiquitin-specific peptidase 31	16p12.3	16:22986804-23068092(-)
USP32	ubiquitin-specific peptidase 32	17q23.3	17:55609473-55824368(-)
USP33	ubiquitin-specific peptidase 33	1p31.1	1:77934264-77998125(-)
USP34	ubiquitin-specific peptidase 34	2p15	2:61268095-61551353(-)
USP35	ubiquitin-specific peptidase 35	11q13.5	11:77584940-77603401(+)
USP36	ubiquitin-specific peptidase 36	17q25.3	17:74295144-74348457(-)
USP37	ubiquitin-specific peptidase 37	2q36.1	2:219023218-219141327(-)
USP38	ubiquitin-specific peptidase 38	4q31.1	4:144325548-144362087(+)
USP39	ubiquitin-specific endopeptidase 39 [misleading]	2p11.2	2:85696794-85729916(+)
USP4	ubiquitin-specific peptidase 4 (ubiquitin carboxy-terminal hydrolase UNP)	3p21.31	3:49290003-49352519(-)
USP40	ubiquitin-specific peptidase 40	2q37.1	2:234048905-234134623(-)
USP41	ubiquitin-specific peptidase 41	22q11.22	22:19047911-19112479(-)
USP42	ubiquitin-specific peptidase 42	7p22.2	7:6111102-6167717(+)
USP43	ubiquitin-specific peptidase 43 [misleading]	17p13.1	17:9489305-9573143(+)
USP44	ubiquitin-specific peptidase 44	12q21.33	12:94435021-94469394(-)
USP45	ubiquitin-specific peptidase 45	6q16.3	6:99990313-100070029(-)
USP46	ubiquitin-specific peptidase 46	4q11	4:53155967-53203747(-)
USP47	ubiquitin-specific peptidase 47	11p15.2	11:11819546-11937448(+)
USP48	ubiquitin-specific peptidase 48	1p36.12	1:21877378-21982275(-)
USP49	ubiquitin-specific peptidase 49	6pter-p12.1	6:41865612-41971077(-)
USP5	ubiquitin-specific peptidase 5	12p13	12:6831570-6846054(+)
USP50	ubiquitin-specific peptidase 50	15q21.1	15:48579646-48626155(-)
USP51	ubiquitin-specific peptidase 51	Xp11.21-22	X:55529687-55532356(-)
USP52	ubiquitin-specific peptidase 52 [misleading]	12q13.2-q13.3	12:54996988-55014017(-)
USP53	ubiquitin-specific peptidase 53	4q27	4:120353239-120435239(+)
USP54	ubiquitin-specific peptidase 54	10q22.3	10:74927302-75055414(-)
USP6	ubiquitin-specific peptidase 6	17q11	17:4960457-5019053(+)
USP7	ubiquitin-specific peptidase 7	16p13.3	16:8894851-8964842(-)
USP8	ubiquitin-specific peptidase 8 (KIAA0055 protein)	15q11.2-q21.1	15:48503871-48580572(+)
USP8P	Mername-AA088 peptidase (deduced from nucleotide sequence by MEROPS)	6p21.3	6:31381649-31384820
USP9X	ubiquitin-specific peptidase 9X	Xp11.4	X:40829832-40980776(+)
USP9Y	ubiquitin-specific peptidase 9Y	Yq11.2	Y:13322554-13482162(+)
VSTM1	family I43 unassigned peptidase inhibitor homologues	19q13.42	19:59235899-59259019(-)
VWF	von Willebrand factor (unit 1)	12p13.3	12:5928301-6104097(-)
WFDC1	family I17 unassigned peptidase inhibitor homologues	16q24.3	16:82885822-82920888(+)
WFDC10A	family I17 unassigned peptidase inhibitor homologues (wap10)	20q13.11	20:43691798-43693249(+)
WFDC10B	family I17 unassigned peptidase inhibitor homologues	20q13.12	20:43746704-43767072(-)
WFDC11	family I17 unassigned peptidase inhibitor homologues (wap11)	20q12-q13.1	20:43710616-43732323(-)
WFDC12	whey acidic protein-2	20q12-q13.1	20:43185481-43186520(-)
WFDC13	family I17 unassigned peptidase inhibitor homologues	20q13.12	20:43764069-43770870(+)
WFDC2	family I17 unassigned peptidase inhibitor homologues	20q12-q13.2	20:43531808-43543585(+)
WFDC3	family I17 unassigned peptidase inhibitor homologues (Wap four-disulfide core unit protein 3)	20q13.12	20:43822388-43853954(-)
WFDC5	family I17 unassigned peptidase inhibitor homologues (WAP1 protein)	20q13.11	20:43171526-43177227(-)
WFDC6	family I17 unassigned peptidase inhibitor homologues (Wap four-disulfide core unit protein 6)	20q13.12	20:43596250-43609442(-)
WFDC8	WFDC8 protein (Homo sapiens) (WFDC8 protein)	20q13.12	20:43613205-43641379(-)
WFDC9	family I17 unassigned peptidase inhibitor homologues (WAP9 protein)	20q12-q13.1	20:43669992-43693321(-)
WFIKKN1	WFIKKN peptidase inhibitor inhibitor unit 3	16p13.3	16:620933-624117(+)
WFIKKN2	WFIKKNRP putative peptidase inhibitor unit 2 (WFIKKNRP protein)	17q21.33	17:46267770-46274706(+)
XPNPEP1	aminopeptidase P1	10q25.3	10:111614514-111673259(-)
XPNPEP2	aminopeptidase P2	Xq25	X:128700627-128731206(+)
XRCC6BP1	Atp23 peptidase	12q14.1	12:56621627-56637318(+)
YME1L1	i-AAA peptidase	10p14	10:27439394-27483332(-)
ZA20D1	Cezanne deubiquitinylating peptidase	1q21.3	1:148178855-148249310(-)
ZMPSTE24	farnesylated-protein converting enzyme 1	1p34	1:40496320-40532443(+)
ZRANB1	TRABID protein	10q26.2	10:126620682-126665995(+)
