# Supplementary material for: Genetic Evidence Supporting the Association of Protease and Protease Inhibitor Genes with Inflammatory Bowel Disease: A Systematic Review
Source: PLoS One. 2011 Sep 8;6(9):e24106. doi: 10.1371/journal.pone.0024106 (PMC3169567; doi:10.1371/journal.pone.0024106)
Supplement: Table S4 — Top ranked P/PI genes in CD mapping to loci identified in the GWAS meta-analysis. Top ranked P/PI genes in CD mapping to loci with genome-wide significance (p<5*10−8) identified in the GWAS meta-analysis by Franke et al. (Nature Genetics, Dec 2010). (XLSX) [file pone.0024106.s007.xlsx]

## Sheet: Table S4
Table S4: Top ranked genes in Crohn's disease mapping to loci identified in the CD GWAS meta-analysis by Franke et al.
Rank	Protease / protease inhibitor	Gene symbol	Genomic location1	Evidence score	Meta-analysis Franke et al2
1	CylD protein	CYLD	16:49333462-49393347	1142	yes
2	acylaminoacyl-peptidase	APEH	3:49686439-49695935	398	yes
2	dystroglycan	DAG1	3:49482595-49548048	398	yes
2	macrophage-stimulating protein	MST1	3:49696393-49701110	398	yes
2	ubiquitin-specific peptidase 4	USP4	3:49290003-49352519	398	yes
6	peroxisomal Lon peptidase	LONP2	16:46835712-46944908	383	no
7	polyserase-3 unit 2	PRSS53	16:31002246-31007631	318	no
7	polyserase-2 unit 3	PRSS36	16:31057750-31068888	318	no
7	prostasin	PRSS8	16:31050255-31054320	318	no
10	complement factor D	DF	19:810665-814606	312	no
10	elastase-2	ELANE	19:803291-807242	312	no
12	carboxylesterase 1	CES1	16:54394267-54424576	284	no
12	carboxylesterase 7	CES7	16:54437629-54466783	284	no
12	matrix metallopeptidase-2	MMP2	16:54070589-54098101	284	no
15	ubiquitin-specific peptidase 40	USP40	2:234048905-234134623	280	yes
16	plasma kallikrein-like protein 4	PRSS54	16:56871403-56886444	220	no
16	Membrane-type matrix metalloproteinase 2	MMP15	16:56616783-56638303	220	no
16	NDRG4 protein	NDRG4	16:57055118-57105024	220	no
19	haptoglobin-1	HP	16:70646009-70652458	212	no
19	haptoglobin-related protein	HPR	16:70654624-70668645	212	no
1 Chromosome: start and end boundaries (base pairs; NCBI Build 36 coordinates)
2 Maps to loci identified in the GWAS meta-analysis on CD by Franke et al, Nature Genetics, December 2010 (p < 5 × 10−8)
