# Supplementary material for: Genetic Evidence Supporting the Association of Protease and Protease Inhibitor Genes with Inflammatory Bowel Disease: A Systematic Review
Source: PLoS One. 2011 Sep 8;6(9):e24106. doi: 10.1371/journal.pone.0024106 (PMC3169567; doi:10.1371/journal.pone.0024106)
Supplement: Table S5 — Top ranked P/PI genes in UC mapping to loci identified in the GWAS meta-analysis. Top ranked P/PI genes in UC mapping to loci with genome-wide significance (p<5*10−8) identified in the GWAS meta-analysis by Anderson et al. (Nature Genetics, Feb 2011). (XLSX) [file pone.0024106.s008.xlsx]

## Sheet: Table S5
Table S5: Top ranked genes in Ulcerative Colitis mapping to loci identified in the UC GWAS meta-analysis by Anderson et al.
Rank	Protease / protease inhibitor	Gene symbol	Genomic location1	Evidence score	Meta-analysis Anderson et al2
1	acylaminoacyl-peptidase	APEH	3:49686439-49695935	363	yes
1	macrophage-stimulating protein	MST1	3:49696393-49701110	363	yes
3	dystroglycan	DAG1	3:49482595-49548048	350	yes
3	ubiquitin-specific peptidase 4	USP4	3:49290003-49352519	350	yes
5	ubiquitin-specific peptidase 19	USP19	3:49120468-49133316	250	yes
6	Glutaminyl cyclase-like	QPCTL	19:50887772-50898426	107	no
7	ubiquitin-specific peptidase 15	USP15	12:60940454-61086165	90	no
8	alpha-2-macroglobulin	A2M	12:9096693-9160020	57	no
8	alpha-2-macroglobulin-like 1 protein	A2ML1	12:8866484-8920646	57	no
8	complement component activated C1r	C1R	12:7138294-7153069	57	no
8	complement component activated C1s	C1S	12:7038278-7048594	57	no
8	proteasome catalytic subunit 3i	PSMB8	6:32916472-32920690	57	yes
8	proteasome catalytic subunit 1i	PSMB9	6:32919891-32955342	57	yes
8	pregnancy-zone protein	PZP	12:9192704-9252233	57	no
8	ubiquitin-specific peptidase 3	USP3	15:61583863-61670712	57	no
8	ubiquitin-specific endopeptidase 39	USP39	2:85696794-85729916	57	no
8	ubiquitin-specific peptidase 5	USP5	12:6831570-6846054	57	no
8	von Willebrand factor inhibitor unit 2	VWF	12:5928301-6104097	57	no
1 Chromosome: start and end boundaries (base pairs; NCBI Build 36 coordinates)
2 Maps to loci identified in the GWAS meta-analysis on UC by Anderson et al, Nature Genetics, February 2011 (p < 5 × 10−8)
